# Supplementary material for: Stunting and Overweight among 12-24-Month-Old Children Receiving Vaccination in Ho Chi Minh City, Vietnam
Source: Biomed Res Int. 2019 Feb 19;2019:1547626. doi: 10.1155/2019/1547626 (PMC6399549; doi:10.1155/2019/1547626)
Supplement: Supplementary Materials — Dataset used for our study was attached. Variables were listed corresponding to the variables name within () in STATA data file. Children's variables including age (tuoi_thang), sex (q2moi), birth weight (q6moi), early breastfeeding (q9moi), receiving complementary foods (bot), weight-for-age Z-score (zwa), length/height-for-age Z-score (zha), weight-for-length/height Z-score (zwh), body mass index Z-score (zbmi), underweight (nhecan), stunting (thapcoi), wasting (teocom), and overweight and obesity (thuacanmoibeophi). Mother's variables including age (q15moi), occupation (q19moi), education (q20moi), gross household income (thunhap_gr), number of children in household (q22moi), and residence location (q18). [file 1547626.f1.xls]

## Sheet: data
id	n1	q18	tuoi_thang	q2moi	q9moi	thunhap_gr	zha	thapcoi	zwa	nhecan	zwh	teocom	chieucao	zbmi	bu6thang	bot	thuacanmoi	q20moi	q15moi	q22moi	q19moi	q6moi
450	1	1	16.1653	0	1	0	-0.63623	0	0.517523	0	0.93107	0	0.77	1.21956	0	0	1	2	1	2	5	0
351	0	1	14.6446	1	1	0	-1.89544	0	-1.26691	0	-0.720407	0	0.74	-0.175925	0	0	0	2	1	0	0	0
174	0	0	21.3884	1	0	0	-1.89542	0	-0.491429	0	0.468081	0	0.8	0.989914	0	0	0	0	1	2	5	0
294	1	1	14.0496	1	1	0	-0.848762	0	-1.05297	0	-1.08955	0	0.76	-0.767617	0	0	0	2	1	1	0	0
667	0	1	22.1488	1	0	0	1.97678	0	1.52419	0	0.583717	0	0.92	0.553499	0	0	0	2	1	2	1	1
718	1	1	13.4215	1	1	0	0.653808	0	2.43977	0	2.59039	0	0.79	2.69131	1	0	1	1	1	1	5	0
753	1	1	19.2066	0	0	0	0.69918	0	0.0138297	0	-0.678865	0	0.84	-0.582274	0	0	0	2	1	0	0	0
307	1	1	20.4298	0	1	0	-1.0275	0	0.889505	0	1.72979	0	0.8	2.06127	0	0	1	1	1	1		0
766	1	1	20.6281	1	1	0	-1.3289	0	-0.374774	0	0.252283	0	0.81	0.644304	1	0	0	2	1	1	5	0
666	1	1	12.9256	0	1	0	-0.811074	0	-1.11279	0	-1.20938	0	0.73	-0.910484	0	0	0	1	1	1	0	0
181	0	0	13.3223	1	1	0	2.33904	0	3.79104	0	3.37857	0	0.83	3.18085	0	0	1	1	1	1	0	0
583	1	1	13.6198	1	1	0	3.40818	0	0.860179	0	-1.00032	0	0.86	-1.41364	0	0	0	1	1	2	0	0
605	1	1	15.3058	1	1	1	-1.75709	0	1.17029	0	2.3457	0	0.75	2.91907	0	0	1	1	1	0	0	0
131	1	0	13.9835	0	1	0	0.610195	0	1.9457	0	2.14019	0	0.78	2.21715	0	1	1	0	1	1	5	0
589	1	1	13.5868	1	1	0	0.168266	0	-0.00448261	0	-0.25139	0	0.78	-0.12718	1	0	0	2	0	0	1	0
641	0	1	19.8017	1	1	0	-0.00410571	0	-1.55238	0	-2.33196	1	0.84	-2.30624	0	0	0	2	1	1	5	0
618	1	1	16.562	0	1		-1.84341	0	0.216722	0	1.24777	0	0.74	1.7911	0	0	1	2	1	2	0	0
721	1	1	13.9174	0	1	0	-0.107066	0	0.281143	0	0.275582	0	0.76	0.46269	0	0	0	2	1	0	5	0
449	1	1	17.6198	1	1	0	2.66186	0	-0.742497	0	-3.04576	1	0.89	-3.36449	0	0	0	2	1	0	5	0
494	1	1	24.7273	0	1	0	-1.94594	0	-0.452219	0	0.797878	0	0.8	1.06753	0	0	1	2	1	1	0	0
382	1	1	15.0413	1	1	0	-0.0751884	0	-1.23942	0	-1.7753	0	0.79	-1.70259	1	0	0	0	1	0	5	1
488	1	1	15.7355	0	1	1	-1.19387	0	-0.662696	0	-0.340872	0	0.75	0.0521067	0	0	0	1	1	0	5	0
188	1	0	14.3802	1	0	1	-0.588756	0	1.11481	0	1.60842	0	0.77	1.95106	0	0	1	1	1	1	5	0
619	1	1	15.2727	0	1		-1.38396	0	0.44042	0	1.24777	0	0.74	1.70458	0	0	1	2	1	2	0	0
497	1	1	11.0413	1	1	0	2.3208	0	1.5948	0	0.681576	0	0.8	0.417671	0	0	0	0	1	1	0	0
236	1	1	24.0992	1	1	0	1.56771	0	0.575931	0	-0.336469	0	0.92	-0.544054	1	0	0	1	1	1	0	1
284	1	1	18.4793	1	1	0		0	0.751701	0		0	0.53		0	0	0	2	1	0	0	1
417	0	1	24.0992	1	1	0	2.54773	0	2.38789	0	1.56771	0	0.95	1.26557	0	0	1	1	1	0	5	0
182	0	0	17.719	0	1	0	-0.837572	0	-1.01145	0	-1.00628	0	0.78	-0.734787	0	0	0	0	1	2	5	0
415	0	1	14.5455	1	1	0	0.93709	0	0.338302	0	-0.194748	0	0.81	-0.260224	0	1	0	1	1	0	5	0
503	0	1	13.9835	1	1	0	-0.82025	0	-0.360341	0	-0.171852	0	0.76	0.177927	0	0	0	2	0	0	0	0
479	1	1	14.1488	1	1	0	-1.29366	0	-1.58895	0	-1.55509	0	0.75	-1.15813	0	0	0	1	1	1	5	0
114	1	0	12.4628	0	1	0	-0.221727	0	-1.01904	0	-1.45671	0	0.74	-1.27152	1	0	0	2	1	0	1	0
157	0	0	12.562	1	1	0	1.07695	0	0.827535	0	0.349287	0	0.79	0.306094	1	0	0	0	0	0	5	0
170	1	0	17.2562	0	1	0	0.0212033	0	1.38823	0	1.72979	0	0.8	1.90373	0	0	1	1	1	1		0
150	1	0	16.4628	1	0	0	-4.09727	1	-0.54339	0	1.80899	0	0.7	2.69438	0	0	1	2	1	2	0	0
453	1	1	17.2231	1	1	0	-2.44103	1	0.183761	0	1.54834	0	0.75	2.26266	0	1	1	1	1	1	0	0
201	1	0	20.3967	1	0	0	-1.61159	0	3.00084	0	4.64051	0	0.8		0	0	0	1	0	0	0	0
644	0	1	23.438	1	1	0	-0.769301	0	0.673625	0	1.29776	0	0.85	1.63062	0	0	1	2	2	2	0	0
470	1	1	21.2231	0	1	0	-1.25909	0	-1.13585	0	-0.844324	0	0.8	-0.52212	0	0	0	2	1	2	5	0
164	1	0	12.1983	1	0	0	-1.66978	0	0.0999641	0	0.986358	0	0.72	1.45772	0	1	1	1	0	0	5	0
664	1	1	15.2727	1	1	0	2.18503	0	1.33001	0	0.339497	0	0.85	0.150843	0	0	0	1	0	0	5	0
379	1	1	24.2645	1	0	0	-0.111505	0	1.50455	0	2.10515	0	0.87	2.18407	0	0	1	2	1	1	0	0
624	1	1	22.7107	1	1		-0.901603	0	-1.18238	0	-1.1712	0	0.84	-0.912453	1	0	0	2	1	1	0	0
100	1	0	16.6281	0	1	0	-1.15887	0	-0.460968	0	-0.0729226	0	0.76	0.307598	0	1	0	0	2	2	0	0
242	1	1	22.7769	1	1	0	-0.249298	0	1.42534	0	1.92814	0	0.86	2.19472	0	0	1	2	1	0	0	0
631	1	1	19.3058	0	0	0	-0.00742956	0	1.97021	0	2.5224	0	0.82	2.72019	1	0	1	2	1	1	5	0
217	0	1	12.3636	0	0	0	0.209283	0	0.411711	0	0.260948	0	0.75	0.394096	0	0	0	0	1	1	1	0
273	1	1	14.5785	1	1	0	-0.274262	0	0.5023	0	0.668252	0	0.78	0.913102	1	0	0	0	2	2	0	0
443	0	1	16.1983	0	0	0	0.420927	0	-0.298885	0	-0.844324	0	0.8	-0.79106	0	0	0	0	1	1	5	0
83	1	0	12.4628	0	1	0	0.547431	0	1.19073	0	1.13629	0	0.76	1.21804	0	0	1	1	1	1	5	0
727	0	1	12.7273	1	1	0	-2.7375	1	-0.296655	0	1.21359	0	0.7	1.80369	0	0	1	2	1	1	5	1
59	1	0	18.1818	1	0	0	-0.9009	0	0.419475	0	0.992334	0	0.8	1.33698	0	0	1	2	1	2	0	0
490	1	1	19.7025	1	1	0	-0.685569	0	-0.229093	0	0.0251261	0	0.82	0.283913	0	0	0	1	1	0	5	1
396	0	1	14.4793	0	0	0	0.764908	0	-0.0774277	0	-0.733218	0	0.79	-0.744719	0	0	0	1	1	1	0	0
222	0	1	16.1653	0	1	0	1.50397	0	-0.122675	0	-1.345	0	0.83	-1.42817	1	0	0	1	1	2	5	0
733	0	1	16.5289	1	1	0	-1.05719	0	-1.01752	0	-0.878302	0	0.78	-0.533336	0	0	0	0	0	0	5	0
473	0	1	15.8347	0	0	0	0.564907	0	-0.234903	0	-0.844324	0	0.8	-0.816289	0	0	0	1	1	1	5	0
296	0	0	23.8678	0	1	0	-2.57693	1	-2.01394	1	-1.00628	0	0.78	-0.483694	0	0	0	0	1	2		0
741	0	1	21.3884	0	1	0	1.28482	0	1.36871	0	0.752082	0	0.88	0.90301	1	0	0	2	1	2	0	0
572	1	1	16.4959	0	1		-1.82082	0	-2.35195	1	-2.21851	1	0.74	-1.74553	0	0	0	2	0	0	0	0
228	1	1	18.5124	0	0	0	1.96854	0	1.80512	0	0.980374	0	0.87	1.0252	0	0	1	2	1	1	0	0
746	0	1	19.438	1	0	0	-2.03688	1	-0.1867	0	0.88386	0	0.78	1.49144	0	0	1	1	2	1	0	1
246	1	1	19.2727	1	0	0	0.53933	0	0.237725	0	-0.181127	0	0.85	-0.0908253	0	0	0	0	1	0	0	0
570	1	1	19.0744	0	1		-3.30569	1	-1.2416	0	0.364009	0	0.72	1.17306	0	0	1	2	0	0	0	0
679	1	1	11.9339	0	0	0	-1.14105	0	-0.407284	0	-0.0101404	0	0.71	0.337753	0	0	0	2	1	1	0	0
548	1	1	18.5124	1	0	0	-1.01423	0	-0.890075	0	-0.684026	0	0.8	-0.379214	0	0	0	2	1	0	0	0
392	1	1	24.0992	0	0	0	-1.7955	0	0.851959	0	2.40122	0	0.8	2.68491	0	0	1	2	1	0	1	0
389	1	1	17.3223	0	0	0	-0.351702	0	-0.0729392	0	-0.0322872	0	0.79	0.174474	0	0	0	1	1	1	5	0
567	1	1	15.4711	1	1		0.136411	0	-1.62336	0	-2.43849	1	0.8	-2.47326	0	0	0	2	2	2	1	0
72	1	0	12.6612	1	1	0	-0.633745	0	-1.2943	0	-1.55509	0	0.75	-1.29081	0	0	0	2	1	0	0	0
62	1	0	12.4628	1	1	0	-1.37353	0	0.498971	0	1.29384	0	0.73	1.74389	0	0	1	1	0	0	0	0
510	1	1	12.9256	0	1		0.331547	0	0.713265	0	0.609488	0	0.76	0.720332	1	0	0	2	1	1	5	0
165	1	0	12.8264	1	1	0	-0.710897	0	0.597974	0	1.00902	0	0.75	1.36405	0	0	1	1	1	0	5	0
430	0	1	13.2231	1	1	0	-0.892053	0	-0.398657	0	-0.18167	0	0.75	0.180118	1	0	0	1	2	1	0	0
717	1	1	16.4959	0	1	1	0.305681	0	1.18156	0	1.27785	0	0.8	1.39975	1	0	1	1	1	1	5	0
262	1	1	18.1157	1	1	0	0.231594	0	0.813845	0	0.832315	0	0.83	0.957345	0	0	0	2	1	0	0	1
388	1	1	16.8595	0	1	0	-1.59186	0	-1.86005	0	-1.6959	0	0.75	-1.26087	0	0	0	2	1	1	5	0
734	0	1	12.595	0	1	0	-0.665548	0	-0.542098	0	-0.517387	0	0.73	-0.23472	0	0	0	2	1	1	0	0
184	1	0	12.3636	0	0	0	4.44849	0	1.21025	0	-1.18638	0	0.86	-1.62153	0	0	0	1	1	0	5	0
398	0	1	23.9669	0	0	0	1.12071	0	0.361781	0	-0.594466	0	0.9	-0.463518	0	0	0	1	1	0	0	0
384	1	1	17.3223	0	1	0	-1.3982	0	-0.669571	0	-0.192528	0	0.76	0.230068	0	0	0	2	1	1	1	0
309	0	1	15.438	1	0	1	-0.632832	0	1.29838	0	1.88752	0	0.78	2.23009	1	0	1	0	2	1	5	0
94	1	0	12.6281	0	1	0	3.15221	0	2.19864	0	1.05495	0	0.83	0.762447	0	0	0	2	1	1	5	0
645	1	1	17.6529	0	0	0	1.95812	0	1.63995	0	0.78638	0	0.86	0.797693	0	0	0	1	1	1	0	0
724	1	1	13.3554	1	0	0	1.09458	0	0.91438	0	0.468081	0	0.8	0.409579	0	0	0	2	1	0	5	0
99	1	0	13.9835	0	1	0	0.237499	0	0.902907	0	0.93107	0	0.77	1.05863	0	0	1	2	1	0	0	0
156	1	0	14.843	0	1	0	0.243547	0	-0.50073	0	-1.00628	0	0.78	-0.92964	0	0	0	0	1	2	0	0
238	1	1	18.7438	1	1	0	-0.727062	0	0.706993	0	1.27972	0	0.81	1.58493	0	0	1	2	1	1	0	0
138	0	0	18.2479	1	0		-0.1862	0	0.939948	0	1.25592	0	0.82	1.45727	0	1	1	1	1	0	5	0
702	0	1	24.4959	0	0	0	1.1841	0	0.481315	0	-0.31307	0	0.9	-0.377955	0	0	0	2	1	1	0	0
254	0	1	15.8347	0	0	0	0.564907	0	1.29291	0	1.27785	0	0.8	1.35555	0	0	1	2	1	1	0	0
736	1	1	16.0992	1	1	0	-0.894019	0	0.217581	0	0.668252	0	0.78	1.03795	1	0	1	1	2	2	0	0
142	1	0	12.3967	0	1	0	0.578882	0	0.145544	0	-0.313926	0	0.76	-0.268321	1	0	0	2	1	1	0	0
171	1	0	18.7107	0	1	0	3.93253	0	1.02415	0	-1.44778	0	0.93	-1.66437	0	0	0	2	1	1	0	0
482	1	1	13.0579	0	1	0	-0.868279	0	-0.163848	0	0.12048	0	0.73	0.454407	1	0	0	2	1	0	0	1
208	1	1	18.7107	0	1	0	-0.485507	0	-0.727523	0	-0.844324	0	0.8	-0.637928	0	0	0	1	1	2	5	0
204	0	1	17.2562	0	1	0	1.4183	0	0.332968	0	-0.678865	0	0.84	-0.692309	0	0	0	0	1	0	5	1
95	1	0	25.1901	1	1	0	-2.60034	1	0.0784743	0	1.95386	0	0.8	2.43663	1	0	1	1	1	1	5	0
418	0	1	19.9008	1	1	0	-1.46209	0	-1.11056	0	-0.684026	0	0.8	-0.289916	0	0	0	1	1	0	5	0
252	0	1	21.157	1	1	0	-1.83091	0	-1.75681	0	-1.32025	0	0.8	-0.892667	0	0	0	2	1	0	0	0
628	1	1	18.9752	0	1	0	-0.572724	0	-1.22497	0	-1.47364	0	0.8	-1.27709	0	0	0	2	1	1	0	0
354	1	1	15.6364	0	1	0	0.644932	0	1.3267	0	1.27785	0	0.8	1.34178	0	1	1	1	1	0		0
670	0	1	12.8264	0	1	0	-0.767799	0	-0.588316	0	-0.517387	0	0.73	-0.214579	0	0	0	2	1	1	0	0
537	0	1	18.2479	0	0	0	-1.01489	0	-0.650265	0	-0.388156	0	0.78	-0.0682597	0	0	0	2	1	0	0	1
299	0	1	15.3719	0	0	0	2.92741	0	-0.597144	0	-3.04382	1	0.86	-3.31574	0	0	0	2	2	1	5	0
654	1	1	15.6364	1	1	0	0.0673679	0	0.873131	0	0.992334	0	0.8	1.14811	1	0	1	1	1	1	5	0
639	1	1	19.9669	1	1	1	0.651384	0	0.50519	0	0.0850522	0	0.86	0.195845	0	0	0	2	1	1	0	0
166	0	0	16.0331	1	1	0	2.99816	0	2.91331	0	1.87924	0	0.88	1.67024	0	0	1	2	1	0	0	0
192	0	0	15.2397	0	1	0	0.808239	0	3.40098	0	3.98239	0	0.8	4.04337	0	0	1	2	1	0	1	0
653	0	1	13.4876	0	0	0	0.0791139	0	0.606268	0	0.609488	0	0.76	0.7678	0	0	0	2	1	0	0	1
277	0	1	21.8182	0	1	0	-3.03321	1	-0.883765	0	0.71171	0	0.75	1.43791	0	0	1	2	1	0	0	1
688	1	1	19.2066	1	1	0	0.201756	0	-1.45978	0	-2.33196	1	0.84	-2.34199	1	0	0	0	1	1	0	0
117	1	0	12.8926	1	1	0	0.0847736	0	-0.330981	0	-0.655846	0	0.77	-0.513429	0	1	0	0	0	1	5	0
286	1	1	19.9339	1	0	0	-1.47222	0	-0.265899	0	0.468081	0	0.8	0.910577	0	0	0	1	1	1	0	0
458	1	1	19.2066	0	0	0	2.71973	0	1.69778	0	0.308102	0	0.9	0.299473	0	0	0	2	1	1	5	0
173	0	0	18.6777	0	0	0	-0.134448	0	0.473366	0	0.571777	0	0.81	0.765744	1	0	0	2	1	1	0	0
646	1	1	13.3554	0	0	0	0.515091	0	0.550727	0	0.288811	0	0.77	0.351577	0	0	0	2	1	1	0	0
761	1	1	14.5455	1	1	0	0.538052	0	1.47183	0	1.48664	0	0.8	1.56675	0	0	1	2	1	0	0	0
385	1	1	15.8347	0	1	0	-1.58924	0	-1.67193	0	-1.45671	0	0.74	-1.00609	1	0	0	2	1	0	1	0
525	1	1	13.9835	1	0	0	-0.0126374	0	1.19403	0	1.40044	0	0.78	1.61464	0	0	1	2	1	1	0	1
699	1	1	13.3223	0	1	0	0.907817	0	0.63747	0	0.186533	0	0.78	0.170546	0	0	0	1	1	1		0
178	1	0	15.6033	0	0	0	-0.0629823	0	0.614489	0	0.722791	0	0.78	0.896418	1	0	0	1	1	2	0	0
576	1	1	12.3636	0	1	0	-0.561481	0	-1.54153	0	-1.96394	0	0.73	-1.72599	1	0	0	2	1	2	0	0
135	1	0	12.4628	1	1	0	0.293829	0	0.228021	0	-0.0329154	0	0.77	0.0935046	0	1	0	1	1	1	1	0
24	1	0	22.1818	1	0	0	-0.0718207	0	1.51894	0	1.92814	0	0.86	2.1696	0	0	1	0	1	1	5	0
129	0	0	12.8595	1	1		1.34085	0	-0.324143	0	-1.32025	0	0.8	-1.50723	0	1	0	2	1	1	5	0
730	1	1	12.2975	0	1	0	-0.531407	0	-0.985111	0	-1.20938	0	0.73	-0.964615	0	0	0	2	1	1	0	0
528	1	1	13.4215	1	1	0	-1.38915	0	1.14773	0	2.09927	0	0.74	2.58474	0	0	1	2	1	0	0	0
516	0	1	12.1983	1	1	0	0.42584	0	-1.09109	0	-1.89715	0	0.77	-1.87154	1	0	0	2	1	0	5	1
357	1	1	12.6942	0	0	0	0.438564	0	2.18588	0	2.52868	0	0.76	2.65888	0	0	1	2	1	0	0	0
87	1	0	19.405	0	1	0	0.966273	0	0.711949	0	0.104498	0	0.85	0.214483	1	0	0	0	1	1	0	0
240	1	1	22.2149	1	1	0	0.596731	0	0.513523	0	0.090591	0	0.88	0.249505	0	0	0	2	1	0	0	0
611	1	1	11.7355	0	1	0	-2.61276	1	-1.29706	0	-0.116239	0	0.67	0.365461	0	0	0	2	0	0	0	0
630	0	1	19.6694	1	0	0	0.0409367	0	-0.554528	0	-0.931597	0	0.84	-0.818048	1	0	0	2	1	1	0	0
324	1	1	15.3058	0	1	0	0.780714	0	1.38346	0	1.27785	0	0.8	1.31832	0	1	1	1	1	0		0
574	1	1	24.7603	0	1	0	1.72065	0	2.2151	0	1.79097	0	0.92	1.76737	1	0	1	2	0	0	0	0
211	0	1	15.405	1	1	0	2.51533	0	0.916682	0	-0.441679	0	0.86	-0.678601	0	0	0	0	1	0	0	0
355	1	1	13.157	0	1	0	1.74256	0	1.05687	0	0.286737	0	0.8	0.135581	0	1	0	1	1	0		0
711	1	1	19.5372	0	0	0	0.585571	0	-0.0390516	0	-0.678865	0	0.84	-0.565816	0	1	0	2	0	0	0	0
372	0	1	22.9091	1	0	0	-1.29133	0	-0.716759	0	-0.216052	0	0.83	0.143012	0	0	0	2	1	0	0	0
571	0	1	15.1405	1	0	0	-0.117143	0	-1.56356	0	-2.20698	1	0.79	-2.15371	0	0	0	2	1	0	0	0
302	0	1	16.3306	1	0	0	-0.982517	0	-3.22611	1	-4.09874	1	0.78	-3.99647	0	0	0	0	1	2		0
187	1	0	14.2479	0	1	0	-0.987752	0	0.302846	0	0.819564	0	0.74	1.19463	1	0	1	2	1	0	0	0
39	1	0	18.9091	0	1	0	0.464771	0	0.43634	0	0.0971403	0	0.83	0.225508	1	0	0	2	1	0	1	0
13	1	0	20.595	1	0	0	0.786475	0	0.76776	0	0.334695	0	0.87	0.454627	0	0	0	1	0	0	5	0
292	1	1	12.562	1	1	0	0.660971	0	1.49173	0	1.40044	0	0.78	1.48929	0	0	1	0	1	1	0	0
125	1	0	17.5207	1	0	0	-1.41498	0	0.917268	0	1.88752	0	0.78	2.38095	0	0	1	2	1	0	0	1
745	1	1	20.1653	0	0	0	0.375858	0	0.593646	0	0.34905	0	0.84	0.520522	0	0	0	2	1	0	5	0
707	1	1	24.0992	0	1	0	0.989618	0	1.54345	0	1.33385	0	0.89	1.36559	0	0	1	2	1	0	5	1
662	0	1	11.9008	1	1	0	2.26412	0	1.22787	0	0.252283	0	0.81	-0.0333234	0	1	0	2	1	2	0	1
549	1	1	12.8926	0	1	0	-0.0344113	0	2.46012	0	3.13058	0	0.75	3.36267	1	0	1	2	0	0	0	0
416	0	1	12.0992	0	1	0	1.49742	0	0.875843	0	0.186533	0	0.78	0.064097	0	0	0	2	1	0		0
632	1	1	20.2645	0	0	0	0.34346	0	0.578318	0	0.34905	0	0.84	0.524953	0	0	0	2	1	0	5	0
113	1	0	12.562	1	1	0	-1.83493	0	-0.261982	0	0.618931	0	0.72	1.1191	0	0	1	0	1	0	0	0
713	0	1	13.5868	1	1	0	-1.46046	0	-1.58746	0	-1.43966	0	0.74	-1.01175	0	0	0	1	1	2	1	0
81	1	0	19.5372	0	1	0	-0.753304	0	-0.43829	0	-0.25923	0	0.8	0.00736054	0	0	0	2	2	2	1	0
397	0	1	15.9008	0	0	0	0.538469	0	-0.246572	0	-0.844324	0	0.8	-0.811644	0	0	0	0	1	1	5	0
265	0	1	22.9091	1	1	0	-2.29482	1	-2.0084	1	-1.32025	0	0.8	-0.809265	0	0	0	2	1	0	0	0
136	1	0	13.9835	1	0	0	-0.0126374	0	1.19403	0	1.40044	0	0.78	1.61464	0	0	1	2	1	1	0	1
526	1	1	14.4793	0	1	0	1.13385	0	0.423252	0	-0.25923	0	0.8	-0.315724	1	0	0	2	1	1	5	0
116	1	0	14.6777	1	0	0	-0.316772	0	0.226545	0	0.334514	0	0.78	0.57698	0	0	0	0	1	0		0
511	1	1	12.6281	0	0	0	-1.06351	0	0.359346	0	0.948805	0	0.72	1.3201	0	0	1	2	1	0	0	1
380	1	1	12.3636	0	0	0	-0.561481	0	-1.65534	0	-2.12324	1	0.73	-1.8879	0	0	0	2	1	1	0	0
77	1	0	15.6033	0	1	0	-0.0629823	0	-0.193917	0	-0.388156	0	0.78	-0.238572	1	0	0	1	1	0	5	0
687	1	1	19.6033	0	1	0	0.563122	0	-0.87461	0	-1.85192	0	0.84	-1.78584	0	0	0	2	1	1	5	0
291	1	1	11.5372	0	0	0	2.57092	0	1.74282	0	0.797878	0	0.8	0.516365	1	0	0	2	1	0	1	0
128	0	0	13.4545	1	0		-0.995176	0	0.467871	0	1.00902	0	0.75	1.42003	1	0	1	1	1	2	5	0
17	0	1	14.7769	1	1	0	-1.55023	0	0.631349	0	1.54834	0	0.75	2.07872	0	0	1	0	1	1	0	0
207	0	1	11.6694	1	1	0	4.51035	0	1.69201	0	-0.441679	0	0.86	-1.01064	1	0	0	1	1	0	5	0
278	1	1	13.7521	0	0	0	1.46169	0	1.45311	0	0.993421	0	0.8	0.908649	1	0	0	2	1	0	1	0
53	1	0	21.3223	1	0	0	-1.8771	0	-0.48139	0	0.468081	0	0.8	0.986585	0	0	0	1	1	1	1	0
205	1	1	13.5868	1	0	0	0.575447	0	0.866913	0	0.676999	0	0.79	0.739504	0	0	0	1	1	0	5	0
33	1	0	20.2645	0	1	0	0.673785	0	0.91478	0	0.577339	0	0.85	0.737964	0	0	0	1	1	2		0
74	1	0	12	1	0	0	-0.315121	0	-0.04555	0	-0.0551192	0	0.75	0.197402	0	0	0	2	1	1	0	0
1	1	0	16.4298	1	1	0	0.130146	0	-1.48711	0	-2.24078	1	0.81	-2.27383	0	0	0	0	2	1	5	0
722	0	1	12.8264	1	1	0	3.42608	0	3.25844	0	2.16121	0	0.85	1.80609	0	0	1	2	2	1	5	0
563	1	1	18.5124	1	0	0	-1.01423	0	-0.890075	0	-0.684026	0	0.8	-0.379214	0	0	0	2	1	0	0	0
524	1	1	12.4628	1	1	0	0.293829	0	0.228021	0	-0.0329154	0	0.77	0.0935046	0	1	0	2	1	1	1	0
517	0	1	13.4545	1	0		-0.995176	0	0.467871	0	1.00902	0	0.75	1.42003	1	0	1	2	1	2	5	0
747	1	1	19.1405	1	1	0	0.587001	0	0.640672	0	0.339497	0	0.85	0.4386	0	0	0	2	1	0	0	0
298	1	1	15.9669	1	1	0	-2.39161	1	-1.92065	0	-1.29125	0	0.74	-0.654843	0	1	0	0	2	2	5	0
440	0	1	23.7025	0	0	0	1.19935	0	0.400395	0	-0.594466	0	0.9	-0.470009	0	0	0	1	1	0	0	0
220	0	1	19.2397	0	0	0	0.687716	0	0.383742	0	-0.148745	0	0.84	-0.0338096	0	0	0	0	2	0	0	0
78	1	0	15.7686	1	0	0	0.401545	0	-1.37101	0	-2.24078	1	0.81	-2.32469	0	0	0	1	1	0	0	0
505	0	1	15.2397	0	1	0	4.07805	0	3.40098	0	2.06374	0	0.89	1.8787	0	0	1	2	1	0	1	0
140	0	0	12.3967	1	0	0	1.16141	0	0.689802	0	0.123829	0	0.79	0.0562597	0	0	0	2	1	1	0	0
92	1	0	12.9917	1	0	0	1.27429	0	1.79174	0	1.48664	0	0.8	1.43199	0	0	1	2	1	1	0	0
213	1	1	11.6364	1	1	0	-0.133048	0	-1.62514	0	-2.32664	1	0.75	-2.18295	0	0	0	1	1	1	5	0
285	0	1	19.5702	1	1	0	0.792183	0	2.26391	0	2.33391	0	0.86	2.43956	0	0	1	2	1	0	0	0
21	1	0	15.405	1	0	0	0.556099	0	1.30469	0	1.27972	0	0.81	1.34204	1	0	1	2	1	1	0	0
264	1	1	20.2314	1	1	0	-1.56235	0	-0.312843	0	0.468081	0	0.8	0.927838	0	0	0	1	1	1	0	0
663	0	1	13.3223	0	0	0	-0.225484	0	0.139178	0	0.144139	0	0.75	0.357918	0	0	0	2	1	0	0	0
130	1	0	11.9669	1	0	0	1.38569	0	1.62398	0	1.19718	0	0.79	1.13051	0	0	1	2	1	1	1	0
93	1	0	13.124	0	1	0	0.241264	0	0.2629	0	0.0449355	0	0.76	0.161178	1	0	0	1	1	2	0	0
594	1	1	14.2479	0	0	0	1.60707	0	1.76871	0	1.33306	0	0.81	1.24873	1	0	1	2	1	0	0	0
404	1	1	12.2314	1	0	0	-0.84732	0	-0.684727	0	-0.583095	0	0.74	-0.252334	0	0	0	0	1	1	5	0
19	1	0	12.8926	1	1	0	-0.741479	0	-1.89001	0	-2.32664	1	0.75	-2.07325	0	1	0	2	1	1	0	0
172	0	0	12.2645	0	0	1	1.41463	0	2.26972	0	2.14019	0	0.78	2.07887	1	0	1	0	2	1	5	0
522	1	1	12.7934	1	1	0	-0.695545	0	0.604953	0	1.00902	0	0.75	1.36106	0	0	1	1	1	1	1	0
529	0	1	12.3967	1	0	0	0.744002	0	0.689802	0	0.334514	0	0.78	0.372505	0	0	0	2	1	1	0	0
636	0	1	21.2562	0	1	0	1.6528	0	1.95395	0	1.33385	0	0.89	1.46374	0	0	1	2	1	0	0	0
367	0	1	14.7107	1	1	0	4.0432	0	1.12905	0	-1.09319	0	0.89	-1.52423	1	0	0	2	1	1	5	0
364	0	1	23.8347	1	1	0	0.107891	0	0.614761	0	0.572374	0	0.88	0.808646	0	0	0	1	1	0	1	1
271	0	1	16.8926	1	1	0	-0.811758	0	-0.618393	0	-0.466152	0	0.79	-0.173608	0	0	0	2	1	0	0	0
347	1	1	12.4959	0	1	1	0.147451	0	0.385441	0	0.260948	0	0.75	0.405747	1	0	0	0	1	1	1	0
678	1	1	18.0496	0	0	0	1.80329	0	1.57685	0	0.78638	0	0.86	0.820797	0	0	0	1	1	1	0	0
723	1	1	15.1074	1	0	0	-0.103191	0	-0.297959	0	-0.466152	0	0.79	-0.317357	1	0	0	2	1	1	0	0
297	0	0	16.1983	1	1	0	0.99433	0	3.19129	0	3.37857	0	0.83	3.39375	0	0	1	1	1	1	0	0
323	0	1	12.7603	0	1	0	-0.356576	0	-0.196908	0	-0.238871	0	0.74	-0.00554144	0	0	0	2	1	0	0	1
11	1	0	12.9256	0	1	0	-0.4302	0	0.551521	0	0.819564	0	0.74	1.08642	0	0	1	2	1	1	0	0
738	0	1	18.6446	1	0	0	0.769625	0	0.723711	0	0.339497	0	0.85	0.406017	0	1	0	1	1	0	5	0
513	0	1	14.3802	1	1	0	-3.39181	1	1.87942	0	4.27765	0	0.7	4.94769	0	0	1	2	1	0	0	0
493	1	1	14.1818	0	1	1	2.75073	0	1.23387	0	-0.148745	0	0.84	-0.365644	1	0	0	1	1	2	0	0
767	1	1	24.4298	0	1	0	-0.335951	0	0.294566	0	0.577339	0	0.85	0.673111	0	1	0	2	1	0	1	0
476	0	1	14.4793	0	0	0	0.764908	0	-0.0774277	0	-0.733218	0	0.79	-0.744719	0	0	0	2	1	1	0	0
672	0	1	12.8264	1	1	0	-2.77938	1	-0.317291	0	1.21359	0	0.7	1.81251	0	0	1	2	1	1	5	1
224	1	1	15.1405	0	1	0	-0.606392	0	1.20544	0	1.81816	0	0.76	2.12237	0	0	1	2	1	1	0	0
199	1	0	12.6281	0	0	0	-1.06351	0	0.359346	0	0.948805	0	0.72	1.3201	0	0	1	2	1	0	0	1
480	1	1	14.1488	1	1	0	-1.29366	0	-2.1357	1	-2.32664	1	0.75	-1.96438	0	0	0	1	1	1	5	0
508	0	1	12.562	1	1	0	1.49294	0	1.88513	0	1.48664	0	0.8	1.39322	0	0	1	2	1	0	0	0
175	0	0	15.4711	0	0	0	0.712442	0	1.68527	0	1.72979	0	0.8	1.78909	0	0	1	1	1	0	5	1
558	1	1	24.595	1	1		0.768164	0	0.504034	0	0.109105	0	0.9	0.0429296	0	0	0	2	2	2	1	0
96	1	0	15.5372	1	1	0	0.49945	0	-0.377303	0	-0.90987	0	0.81	-0.92758	0	0	0	1	1	1	0	0
487	0	1	21.7521	0	0	0	-0.120179	0	-0.00686789	0	-0.148745	0	0.84	0.0744715	0	0	0	1	2	0	0	0
519	1	1	11.9669	1	0	0	1.38569	0	1.62398	0	1.19718	0	0.79	1.13051	0	0	1	2	1	1	1	0
475	0	1	15.9008	0	0	0	0.538469	0	-0.246572	0	-0.844324	0	0.8	-0.811644	0	0	0	1	1	1	5	0
601	0	1	12.7934	1	0		1.37437	0	1.83455	0	1.48664	0	0.8	1.41416	0	0	1	1	1	0	0	1
596	1	1	13.6198	0	0	0	0.396678	0	1.68318	0	1.89597	0	0.77	2.01208	1	0	1	2	1	0	0	0
177	1	0	12.2645	1	1	0	0.392596	0	1.14684	0	1.09512	0	0.77	1.23984	0	0	1	1	1	0	5	0
507	0	1	13.124	1	0	1	0.386121	0	0.962455	0	0.88386	0	0.78	1.00757	0	0	1	2	1	0	0	0
303	0	1	19.2066	1	1	0	1.64719	0	2.32715	0	1.87924	0	0.88	1.88948	0	1	1	2	1	0	0	0
491	1	1	19.9339	0	1	0	0.119899	0	-1.10714	0	-1.84362	0	0.83	-1.73722	0	0	0	1	1	0	0	0
710	1	1	18.7438	0	0	0	0.522434	0	0.0884148	0	-0.428201	0	0.83	-0.323249	1	0	0	2	1	1	0	0
495	1	1	24.2314	0	0	0	0.0253833	0	-0.762471	0	-1.18638	0	0.86	-1.21034	0	0	0	2	1	0	5	0
749	0	1	21.4215	0	1	0	1.5977	0	1.92969	0	1.33385	0	0.89	1.46979	0	0	1	2	1	0	0	0
648	1	1	12.8595	0	0	0	-0.019461	0	-0.594882	0	-0.99081	0	0.75	-0.839011	0	1	0	2	1	1	1	0
134	0	0	12.595	0	1	0	-0.282035	0	0.280382	0	0.366479	0	0.74	0.596546	1	0	0	1	1	1	0	0
231	1	1	24.0331	0	0	0	-2.08927	1	-0.73286	0	0.508809	0	0.79	0.811519	0	0	0	2	1	1	5	1
426	0	1	20.6612	1	1	0	-0.988347	0	-0.379901	0	0.0251261	0	0.82	0.339683	0	0	0	0	2	1	0	0
431	0	1	12.562	1	1	0	0.660971	0	0.654196	0	0.334514	0	0.78	0.387803	0	0	0	2	1	1		0
441	0	1	23.438	0	0		0.0274427	0	0.634774	0	0.609364	0	0.86	0.861545	0	0	0	2	1	1	5	0
634	1	1	18.876	1	1	0	0.683635	0	0.684788	0	0.339497	0	0.85	0.421403	0	0	0	2	1	0	0	0
620	0	1	24.2645	0	1	0	-0.292198	0	0.578691	0	0.936413	0	0.85	1.0415	0	0	1	2	1	1	0	0
424	0	1	12.6612	1	0	0	-1.04887	0	-0.282827	0	0.073774	0	0.74	0.461125	0	0	0	1	1	0	0	0
159	1	0	12.9587	0	1	0		0	2.74496	0	0.0917284	0	0.91	-0.38651	0	0	0	1	1	1	1	0
420	1	1	22.5785	1	1	1	-3.22173	1	-0.668678	0	1.09512	0	0.77	1.95493	0	0	1	1	1	0	5	0
459	0	1	14.1818	1	1	0	-0.101119	0	0.49482	0	0.558413	0	0.78	0.7655	0	0	0	1	1	1	5	0
756	1	1	22.8099	1	0	0	-2.26999	1	0.281233	0	1.77005	0	0.8	2.36917	1	0	1	2	1	0	5	0
71	1	0	12.7934	0	0	0	2.3021	0	2.16684	0	1.51229	0	0.81	1.313	0	0	1	2	1	0	5	0
345	1	1	16.595	1	1	0	-1.84588	0	-1.02901	0	-0.424689	0	0.76	0.134679	1	0	0	1	1	1	0	0
226	1	1	22.0165	0	1	0	-2.44125	1	-0.427006	0	0.93107	0	0.77	1.51165	1	0	1	2	1	0	0	0
152	1	0	13.124	0	0	1	1.3792	0	1.42923	0	1.01539	0	0.79	0.93535	0	0	0	0	2	1	5	0
739	0	1	19.7025	1	1	0	0.74485	0	1.2638	0	1.05456	0	0.86	1.1692	1	0	1	2	1	1	5	1
325	1	1	16.2314	0	1	0	0.408009	0	0.5062	0	0.286737	0	0.8	0.372706	0	1	0	1	1	0		0
474	0	1	23.9669	0	0	0	1.12071	0	0.361781	0	-0.594466	0	0.9	-0.463518	0	0	0	2	1	0	0	0
523	0	1	12.595	0	1	0	-0.282035	0	0.280382	0	0.366479	0	0.74	0.596546	1	0	0	2	1	1	0	0
274	0	1	22.7107	1	1	0	-2.245	1	-1.98062	0	-1.32025	0	0.8	-0.817909	0	0	0	2	1	0	0	0
545	1	1	24.5289	0	0		-0.362091	0	1.48273	0	2.22682	0	0.85	2.36461	1	0	1	2	1	1	0	0
561	1	1	18.2149	0	1		-0.31801	0	-0.222152	0	-0.25923	0	0.8	-0.0625035	0	0	0	2	0	0	0	0
60	1	0	14.4132	0	1	0	1.16298	0	0.0208358	0	-0.844324	0	0.8	-0.922052	1	0	0	1	1	1	5	0
109	1	0	12.6942	1	0	0	-0.649254	0	-0.289748	0	-0.18167	0	0.75	0.131623	1	0	0	1	1	0	0	0
744	1	1	18.843	0	0	0	0.148746	0	2.041	0	2.5224	0	0.82	2.69917	1	0	1	2	1	1	5	0
212	1	1	11.6364	1	1	0	-0.133048	0	-1.07537	0	-1.55509	0	0.75	-1.38359	0	0	0	1	1	1	5	0
279	1	1	12.3306	1	1	0	0.777497	0	1.54257	0	1.40044	0	0.78	1.46831	0	0	1	0	1	1	0	0
27	1	0	13.8182	1	1	0	-0.748325	0	-1.85001	0	-2.26437	1	0.76	-2.01697	0	0	0	0	1	1	5	0
167	0	0	13.157	1	0	0	0.370311	0	-2.6451	1	-4.09874	1	0.78	-4.22675	0	0	0	1	1	2		0
543	1	1	24.1322	1	1		0.904531	0	1.2183	0	1.01702	0	0.9	0.95774	0	0	0	2	2	2	1	0
15	1	0	13.2562	1	0	0	-0.9069	0	0.0623597	0	0.433804	0	0.75	0.814838	0	0	0	2	1	1	5	0
402	1	1	13.6198	1	0	0	-1.06771	0	0.258653	0	0.783468	0	0.75	1.20467	0	1	1	1	1	0	5	0
580	1	1	12.8926	0	0	0	0.727861	0	0.719639	0	0.399541	0	0.77	0.42525	0	0	0	2	1	0	0	0
569	1	1	21.2562	0	0		-0.294741	0	-0.309498	0	-0.428201	0	0.83	-0.207492	1	0	0	2	1	1	0	0
318	1	1	18.5785	0	0	0	-1.80407	0	-0.282144	0	0.609488	0	0.76	1.11681	0	0	1	1	2	1	5	1
234	1	1	18.1818	0	1	0	-0.306657	0	-0.216676	0	-0.25923	0	0.8	-0.0643817	0	0	0	2	1	0	0	0
685	1	1	13.9174	0	0	0	0.266132	0	0.445477	0	0.288811	0	0.77	0.39812	0	0	0	2	1	1	0	0
270	1	1	12.6281	1	1	0	0.628039	0	1.47734	0	1.40044	0	0.78	1.49526	0	0	1	0	1	1	0	0
551	1		13.9835	0			-0.135197	0	0.513912	0	0.609488	0	0.76	0.808388	0	0	0					0
532	1	1	13.8512	0	1	0	-0.452501	0	1.29393	0	1.8314	0	0.75	2.11672	0	0	1	1	1	1	0	0
63	1	0	18.4132	1	1	0	0.121969	0	1.05791	0	1.21913	0	0.83	1.37312	1	0	1	2	1	1	0	0
750	1	1	14.3471	0	1	0	-2.50716	1	0.0329844	0	1.44539	0	0.7	2.06335	0	0	1	2	1	1	0	0
498	0	1	12.562	1	1	0	1.49294	0	1.49173	0	0.992334	0	0.8	0.881473	0	0	0	2	1	1	5	0
70	1	0	12.562	0	1	0	-0.267013	0	-0.8333	0	-1.1702	0	0.74	-0.971284	1	0	0	1	2	2	0	1
340	0	1	23.7355	1	0	0	-1.50851	0	-0.834812	0	-0.216052	0	0.83	0.176651	0	0	0	2	1	0	0	0
123	1	0	12.3636	1	1	0	2.84922	0	0.249296	0	-1.40187	0	0.83	-1.84691	0	0	0	2	1	0	5	0
429	0	1	12.8926	1	1	0	-0.741479	0	1.01116	0	1.54834	0	0.75	1.91928	0	0	1	2	1	1		0
393	1	1	20.1322	1	1	0	-2.24127	1	-1.14636	0	-0.25139	0	0.78	0.368802	1	0	0	1	1	1		0
305	1	1	14.5124	1	1	0	0.552882	0	0.258324	0	-0.0894223	0	0.8	-0.0685029	0	0	0	0	1	1	0	0
625	1	1	20.595	1	1		-0.266271	0	-0.868459	0	-1.1712	0	0.84	-1.01736	1	0	0	2	1	1	0	0
457	0	1	21.8843	0	1	0	0.803913	0	-0.406658	0	-1.43779	0	0.87	-1.32191	1	0	0	2	1	1	0	0
586	1	1	14.4793	1	0	0	-1.03064	0	-0.645073	0	-0.424689	0	0.76	-0.0398125	0	0	0	1	1	0	5	0
311	0	1	24.562	1	0	0	0.454122	0	-0.949661	0	-1.78019	0	0.89	-1.89509	0	0	0	0	1	2	5	0
604	1	1	15.8347	1	1	1	-2.34423	1	1.07037	0	2.58571	0	0.74	3.25481	0	0	1	1	1	0	0	0
676	0	1	21.1901	0	1	0	1.35003	0	1.3982	0	0.752082	0	0.88	0.895518	1	0	0	2	1	2	0	0
582	1	1	13.4215	1	1	0	-0.980558	0	-0.438661	0	-0.18167	0	0.75	0.198108	0	0	0	0	1	1	0	1
8	1	0	9.42149	0	0	0	0.527619	0	0.442734	0	0.117353	0	0.72	0.189679	0	0	0	2	1	1	0	0
514	1	1	17.5207	1	0	0	-1.41498	0	0.917268	0	1.88752	0	0.78	2.38095	0	0	1	2	1	0	0	1
684	0	1	22.6446	1	1	0	-0.546732	0	0.793548	0	1.29776	0	0.85	1.5987	0	0	1	2	2	2	0	0
484	0	1	14.876	0	0	0	-0.868074	0	-0.0635212	0	0.260948	0	0.75	0.601652	0	0	0	1	1	1	1	0
91	1	0	12.0992	0	1	0	0.722347	0	1.03338	0	0.82449	0	0.76	0.867636	0	0	0	0	0	1	5	0
215	1	1	10.5124	0	1	0	0.341419	0	0.366125	0	0.12048	0	0.73	0.227082	1	0	0	2	1	0	0	1
584	1	1	12.595	1	1	0	-0.602608	0	0.199861	0	0.433804	0	0.75	0.754571	0	0	0	1	1	0	5	0
362	0	1	14.4132	0	1	0	-0.68423	0	-0.797521	0	-0.856655	0	0.75	-0.574168	0	0	0	1	0	0	1	0
49	1	0	12.3306	0	1	0	-1.31776	0	-0.786188	0	-0.410199	0	0.71	-0.0335224	0	1	0	0	1	2	0	0
330	1	1	12.6281	1	0	0	0.628039	0	1.06765	0	0.88386	0	0.78	0.96247	0	0	0	0	1	2	5	0
573	1	1	19.7025	1	0	0	0.0296403	0	-0.229093	0	-0.470242	0	0.84	-0.331339	0	0	0	2	1	0	0	0
108	1	0	13.6198	0	1	0	-0.354264	0	-1.25042	0	-1.6959	0	0.75	-1.49605	0	0	0	2	1	1	5	0
35	1	0	13.3223	1	1	0	-2.98367	1	-0.418715	0	1.21359	0	0.7	1.85605	0	0	1	2	1	2	1	0
610	1	1	11.7355	0	1	0	-2.61276	1	-1.29706	0	-0.116239	0	0.67	0.365461	0	0	0	2	0	0	0	0
378	0	1	24.6942	1	1	0	-3.45793	1	0.00734601	0	2.3699	0	0.77	3.09518	1	0	1	1	1	1	5	1
542	1	1	24.6612	1	1		3.01038	0	1.73996	0	0.369538	0	0.97	-0.0410399	0	0	0	2	2	1	1	0
581	1	1	12.8926	1	1	0	-1.15461	0	-2.1184	1	-2.38321	1	0.74	-2.05274	0	0	0	1	1	0	0	0
425	0	1	12.562	0	1	0	-0.267013	0	-0.250072	0	-0.365605	0	0.74	-0.151932	0	0	0	1	1	2	0	0
692	0	1	13.0909	1	0	0	0.813388	0	0.0962446	0	-0.466152	0	0.79	-0.495196	0	0	0	2	1	0	0	0
544	0	1	24.2645	0	1		2.17691	0	1.93996	0	1.09851	0	0.93	1.00815	1	0	1	2	1	1	1	0
46	1	0	12.562	1	1	0	-1.00296	0	-1.48947	0	-1.59048	0	0.74	-1.26015	1	0	0	1	2	2	0	0
693	1	1	19.8017	1	1	0	-1.7884	0	-2.03411	1	-1.7753	0	0.79	-1.35731	0	0	0	1	1	1	5	0
562	1	1	18.2149	0	1		-0.660998	0	-0.222152	0	-0.0322872	0	0.79	0.227431	0	0	0	2	1	0	0	0
492	1	1	17.2231	1	1	0	-2.44103	1	0.183761	0	1.54834	0	0.75	2.26266	0	1	1	2	1	1	0	0
464	0	1	19.7686	1	1	0	0.00711916	0	-0.654788	0	-1.05063	0	0.84	-0.937698	0	0	0	1	1	0	5	1
90	1	0	11.8347	1	1	0	-1.07747	0	-1.01266	0	-0.871057	0	0.73	-0.519933	0	0	0	0	0	1	5	0
50	1	0	13.2893	0	1	0	0.923071	0	0.643736	0	0.186533	0	0.78	0.167753	0	0	0	1	1	1	0	0
501	0	1	15.8347	0	1	0	0.564907	0	1.93748	0	2.15641	0	0.8	2.24534	1	0	1	1	1	2	0	0
317	1	1	18.5785	0	0	0	-2.14475	1	-2.1671	1	-1.6959	0	0.75	-1.15998	0	0	0	1	1	1	0	1
518	0	1	12.8595	1	1	0	1.34085	0	-0.324143	0	-1.32025	0	0.8	-1.50723	0	1	0	2	1	1	5	0
413	1	1	15.7025	1	1	0	-1.12819	0	0.0345558	0	0.549267	0	0.77	0.977724	0	0	0	1	1	0	0	0
742	0	1	21.0909	0	1	0	1.38291	0	1.41298	0	0.752082	0	0.88	0.891682	1	0	0	2	1	2	0	0
759	1	1	23.438	0	0	0	-0.598171	0	0.439157	0	0.817774	0	0.84	1.11003	0	0	1	2	1	0	1	0
197	1	0	14.9091	1	1	0	-0.414777	0	-1.21505	0	-1.55149	0	0.78	-1.37355	0	0	0	1	1	0	5	0
633	0	1	19.2727	1	0	0	-1.98665	0	-0.16002	0	0.88386	0	0.78	1.48137	0	0	1	1	2	1	0	1
390	1	1	15.8347	1	1	0	-0.791036	0	-0.894999	0	-0.878302	0	0.78	-0.588655	0	1	0	2	1	1	0	0
32	1	0	25.5868	0	1	0	0.878034	0	1.33516	0	1.11942	0	0.9	1.14812	0	0	1	1	1	1	1	0
546	1	1	18.8099	0	1		-0.518384	0	-0.320095	0	-0.25923	0	0.8	-0.0297989	0	0	0	2	0	0	0	0
697	1	1	18.843	1	1	0	-1.12491	0	0.230206	0	0.889978	0	0.8	1.27604	1	0	1	2	0	0	0	0
454	1	1	14.1818	0	1	1	2.75073	0	1.23387	0	-0.148745	0	0.84	-0.365644	1	0	0	0	1	2	0	0
728	1	1	15.2727	1	1	0	2.18503	0	1.33001	0	0.339497	0	0.85	0.150843	0	0	0	1	0	0	5	0
352	1	1	23.9669	0	1	0	0.500557	0	-0.340218	0	-1.13681	0	0.88	-0.973838	0	0	0	2	1	0	0	0
256	1	1	11.1074	0	0	0	2.80746	0	1.97414	0	0.993421	0	0.8	0.67807	1	0	0	2	1	0	1	0
16	1	1	23.3719	1	1	0	-2.40821	1	-0.0189653	0	1.48664	0	0.8	2.10852	0	0	1	0	2	2	5	0
754	1	1	20.2645	0	0	0	-2.29914	1	-0.982065	0	0.0449355	0	0.76	0.627968	0	0	0	1	1	0	5	0
229	1	1	19.2397	0	1	0	-0.658495	0	0.527804	0	0.993421	0	0.8	1.26857	0	0	1	2	1	1	0	0
512	0	1	12.2975	0	0	0	-0.917327	0	-0.985111	0	-0.952686	0	0.72	-0.642403	0	1	0	1	1	0	0	0
554	1	1	19.0413	1	0	0	-1.19007	0	-0.975249	0	-0.684026	0	0.8	-0.343859	0	0	0	2	1	0	0	0
272	1	1	15.3058	1	1	0	-1.36442	0	-1.28776	0	-1.08955	0	0.76	-0.659603	0	0	0	2	1	1	0	0
607	1	1	15.0413	0	1	1	0.89156	0	1.75911	0	1.72979	0	0.8	1.75867	0	0	1	0	1	0	0	0
22	1	0	12.1983	1	0	0	0.844964	0	-1.19727	0	-2.27724	1	0.78	-2.3733	1	0	0	1	1	2	0	0
346	0	1	14.843	0	1	0	-0.122684	0	0.35771	0	0.399541	0	0.77	0.584101	1	0	0	1	1	1	5	1
758	1	1	13.3223	0	0	0	0.53005	0	0.795517	0	0.616474	0	0.77	0.683427	0	0	0	2	1	0	0	0
468	0	1	23.0744	0	1	0	-3.017	1	-0.588473	0	1.13629	0	0.76	1.82248	0	0	1	2	1	0	1	1
614	1	1	24.7273	0	1	0	-0.10776	0	-0.16109	0	-0.239443	0	0.86	-0.19366	1	0	0	2	1	2	0	0
703	0	1	19.6694	0	1	0	-1.4627	0	-1.43572	0	-1.13563	0	0.78	-0.763948	1	0	0	2	1	1	5	0
706	1	1	21.9174	0	1	0	-1.13206	0	-2.30477	1	-2.5505	1	0.81	-2.33927	0	0	0	0	1	0		0
179	0	0	12.1983	0	0	0	4.54144	0	0.00671939	0	-3.04382	1	0.86	-3.53687	0	0	0	2	2	1	5	0
350	1	1	12.1983	0	0	0	-0.486012	0	-1.6206	0	-2.12324	1	0.73	-1.90172	0	0	0	2	1	1	0	0
566	1	1	24.8926	1	1		2.28981	0	1.10605	0	-0.0530994	0	0.95	-0.38788	0	0	0	2	2	1	1	0
241	1	1	16.9917	1	1	0	-0.469768	0	0.626001	0	0.992334	0	0.8	1.25272	0	0	1	2	1	0	0	0
289	0	1	17.4876	0	0	0	-0.0626075	0	1.01803	0	1.27785	0	0.8	1.46118	0	0	1	2	1	1	0	0
681	1	1	13.124	0	0	0	-0.138049	0	-0.647106	0	-0.99081	0	0.75	-0.816531	0	1	0	2	1	1	1	1
358	1	1	21.124	0	1	0	0.070598	0	-0.288934	0	-0.678865	0	0.84	-0.496109	1	0	0	1	1	1	0	0
244	1	1	21.3554	1	0	0	0.185935	0	0.28499	0	0.0850522	0	0.86	0.272693	0	0	0	0	1	2	0	0
66	1	0	12.1983	1	0	0	0.844964	0	-1.19727	0	-2.27724	1	0.78	-2.3733	0	0	0	1	1	2	0	1
45	1	0	13.2562	1	1	0	0.323112	0	-0.215538	0	-0.622299	0	0.78	-0.543747	0	0	0	1	0	1	5	0
275	0	1	15.6694	0	1	0	-0.809297	0	0.211267	0	0.609488	0	0.76	0.936123	0	0	0	2	1	0	0	0
375	1	1	15.6364	1	1	0	-1.49237	0	-0.859331	0	-0.424689	0	0.76	0.0580847	1	0	0	1	1	1	0	0
760	1	1	13.0909	0	0	0	-0.123351	0	-0.170284	0	-0.340872	0	0.75	-0.156237	0	0	0	2	1	0	0	0
23	1	0	17.9835	0	0	0	-1.9604	0	0.585489	0	1.8314	0	0.75	2.38565	0	1	1	0	2	2	1	0
714	0	1	13.6529	1	0	0	0.950981	0	-1.4934	0	-2.73996	1	0.8	-2.94326	0	0	0	1	0	0	5	0
637	0	1	18.3471	0	1	0	0.3211	0	1.21318	0	1.28697	0	0.82	1.43584	0	0	1	2	1	0	0	0
466	1	1	18.1818	0	1	0	2.09574	0	2.92845	0	2.49333	0	0.87	2.53347	0	1	1	2	1	1	5	0
381	1	1	15.8678	1	0	0	-1.96809	0	-0.900915	0	-0.18167	0	0.75	0.408359	1	0	0	1	1	0	0	0
698	1	1	19.0744	0	1	0	2.77074	0	1.09871	0	-0.594466	0	0.9	-0.64209	0	1	0	2	1	1	5	0
383	1	1	15.9669	0	1	0	-0.204031	0	0.15932	0	0.186533	0	0.78	0.375356	0	1	0	2	0	0	1	0
366	0	1	14.314	1	1	0	0.642601	0	1.20719	0	1.09349	0	0.8	1.1423	1	0	1	2	1	1	5	0
248	1	1	21.9504	1	0	0	-2.73022	1	-1.68819	0	-0.622299	0	0.78	0.07993	1	0	0	2	1	0	0	0
148	1	0	18.2479	0	0	0	-1.01489	0	-1.58674	0	-1.67383	0	0.78	-1.39573	0	0	0	1	1	0	0	1
280	0	1	16.2314	1	1	0	-0.559753	0	-0.502462	0	-0.466152	0	0.79	-0.225161	0	0	0	2	1	0	0	0
557	1	1	25.0579	0	0		-0.499933	0	0.83647	0	1.44599	0	0.85	1.58184	1	0	1	2	1	1	0	0
419	1	1	23.7686	1	1	0	1.44233	0	1.27299	0	0.583717	0	0.92	0.622493	0	0	0	1	0	0	5	0
530	0	1	13.4545	1	1	0	-0.995176	0	-1.45446	0	-1.55509	0	0.75	-1.21948	0	1	0	2	1	0	0	0
329	1	1	24.6281	1	1	0	-2.79757	1	1.62822	0	4	0	0.79	4.50564	1	0	1	1	1	1	0	0
42	1	0	13.2562	1	1	0	3.19314	0	1.73544	0	0.339497	0	0.85	-0.0258236	0	0	0	1	1	1	0	0
163	1	0	12.1653	0	1	0	0.303192	0	0.192074	0	-0.0947204	0	0.75	0.0138741	1	0	0	1	1	1	5	0
674	0	1	19.6033	1	1	0	0.78031	0	1.28036	0	1.05456	0	0.86	1.16324	1	0	1	2	1	1	5	1
757	1	1	13.3223	0	1	0	0.152283	0	1.39188	0	1.62948	0	0.76	1.79329	0	0	1	1	1	1	5	0
600	0	1	14.2149	1	0	0	-3.33045	1	-1.08467	0	0.574228	0	0.7	1.29323	1	0	1	2	1	1	0	0
313	0	1	15.2397	1	1	0	0.234412	0	0.94805	0	0.992334	0	0.8	1.11585	0	1	1	1	1	0	5	0
332	0	1	14.6116	0	1	0	-0.763772	0	-0.834693	0	-0.856655	0	0.75	-0.558664	0	0	0	1	0	0	1	0
403	1	1	12.562	1	0	0	0.244987	0	1.88513	0	2.09241	0	0.77	2.28938	0	1	1	1	1	0	0	0
592	1	1	25.2893	0	1	0	-0.558688	0	0.171171	0	0.577339	0	0.85	0.691426	0	0	0	1	1	0	0	0
765	1	1	17.5207	0	0	0	3.40064	0	3.72159	0	2.83806	0	0.9	2.78019	0	0	1	1	1	1	1	0
650	1	1	17.5868	0	0	0	-0.445216	0	0.650296	0	1.01539	0	0.79	1.25715	1	0	1	2	1	1	5	0
598	1	1	13.3223	0	0	0	-0.603251	0	-0.215091	0	-0.114092	0	0.74	0.169716	0	0	0	2	1	0	0	0
439	0	1	15.1736	0	0	0	0.472091	0	-0.20361	0	-0.733218	0	0.79	-0.69176	0	0	0	1	1	0	0	0
301	0	1	15.7355	1	1	0	-0.362791	0	0.199618	0	0.349287	0	0.79	0.583768	1	0	0	0	0	0	5	0
655	1	1	12.7603	1	1	0	0.976922	0	2.58349	0	2.59039	0	0.79	2.63594	1	0	1	2	1	1	5	0
578	1	1	16.562	1	1	0	-0.30496	0	0.300409	0	0.468081	0	0.8	0.679897	1	0	0	2	1	1	5	0
121	1	0	12.9587	0	1	0		0	2.74496	0	0.0917284	0	0.91	-0.38651	0	0	0	1	0	1	1	0
6	1	0	13.0909	1	0	0	-0.00945117	0	-2.87795	1	-4.22424	1	0.77	-4.2546	0	0	0	0	1	2	0	0
371	1	1	16.9587	1	1	0	-0.836308	0	-1.38021	0	-1.49818	0	0.79	-1.25618	0	0	0	2	1	0	0	0
668	1	1	13.2562	1	0	0	-1.3169	0	-0.896955	0	-0.583095	0	0.74	-0.158025	0	0	0	2	1	0	5	0
649	1	1	17.7521	1	1	0	-0.749431	0	0.876785	0	1.48664	0	0.8	1.81153	1	0	1	2	0	0		0
705	1	1	19.4711	0	1	1	0.943236	0	0.19953	0	-0.607466	0	0.85	-0.515548	0	1	0	2	1	0	0	0
200	0	0	12.2975	0	0	0	-0.917327	0	-0.985111	0	-0.952686	0	0.72	-0.642403	0	1	0	0	1	0	0	0
68	1	0	12.6281	1	0	0		0	0.192857	0		0	0.64	4.37259	0	0	1	1	1	0	0	0
169	1	0	12.7934	0	1	1	1.15632	0	2.16684	0	2.14019	0	0.78	2.12293	0	0	1	1	1	1	0	0
186	1	0	11.0413	1	1	0	2.3208	0	1.5948	0	0.681576	0	0.8	0.417671	0	0	0	2	1	1	0	0
597	1	1	14.6116	0	1	0	-2.23559	1	-0.0154605	0	1.19386	0	0.71	1.78147	0	0	1	2	1	1	0	0
44	1	0	12.1322	0	0	0	-2.39189	1	-0.448185	0	0.804225	0	0.68	1.31073	1	0	1	2	1	0	0	0
442	0	1	23.7686	1	1	0	0.784694	0	1.87617	0	1.84124	0	0.9	1.98009	0	0	1	0	1	0	5	0
686	1	1	23.2727	0	0	0	0.387592	0	1.09212	0	0.980374	0	0.87	1.21446	0	0	1	2	1	0	5	0
233	0	1	21.8843	0	0	0	-0.159457	0	0.118643	0	0.0540588	0	0.84	0.287248	0	0	0	2	1	0	0	0
593	1	1	13.3884	0	1	0	-1.00885	0	1.0132	0	1.77268	0	0.73	2.16006	1	0	1	2	1	1	5	0
3	1	0	12.4628	0	1	0	-3.68294	1	-0.0464987	0	2.29069	0	0.65	2.89881	1	0	1	2	1	1	5	0
731	0	1	21.719	0	0	0	2.46591	0	1.88615	0	0.700043	0	0.92	0.74952	0	0	0	2	1	2	1	1
395	1	1	16.4959	0	1	0	0.305681	0	0.38434	0	0.180458	0	0.8	0.281856	0	0	0	2	1	0	0	0
671	0	1	12.4959	1	1	0	-0.972156	0	-1.36725	0	-1.43966	0	0.74	-1.1103	0	0	0	1	1	2	1	0
191	0	0	13.9835	1	1	0	-0.82025	0	-0.360341	0	-0.171852	0	0.76	0.177927	0	0	0	1	0	0	0	0
435	1	1	25.6529	1	1	0	0.15237	0	-0.485623	0	-0.874779	0	0.89	-0.896815	0	0	0	2	1	0	0	0
10	1	0	12.0992	0	1	0	-0.0527295	0	0.0268636	0	-0.114092	0	0.74	0.0632673	1	0	0	2	0	0	0	0
445	1	1	18.1818	0	1	0	2.09574	0	2.92845	0	2.49333	0	0.87	2.53347	0	1	1	1	1	1	5	0
422	0	1	13.6198	1	0	0	-2.69531	1	-1.2765	0	-0.143787	0	0.71	0.484267	0	1	0	2	1	1	0	0
462	0	1	23.7025	0	0	0	0.265038	0	0.400395	0	0.0972131	0	0.87	0.325857	0	0	0	2	1	0	0	0
161	1	0	14.843	0	1	0	0.243547	0	-0.50073	0	-1.00628	0	0.78	-0.92964	0	0	0	0	1	2	0	0
768	1	1	21.3223	1	0	0	0.542132	0	0.652117	0	0.334695	0	0.87	0.493449	0	0	0	2	1	1	5	0
333	0	1	14.0496	0	1	1	-0.535386	0	-0.728823	0	-0.856655	0	0.75	-0.60311	0	0	0	1	0	0	1	0
349	1	1	24.0992	1	0	0	-0.0656551	0	1.22324	0	1.69487	0	0.87	1.7706	0	0	1	2	1	1	0	0
446	1	1	17.6198	1	1	0	2.66186	0	-0.742497	0	-3.04576	1	0.89	-3.36449	0	1	0	2	1	0	5	0
202	0	0	13.2231	1	1	0	1.15938	0	1.35033	0	0.992334	0	0.8	0.941653	0	0	0	2	1	1	5	0
132	0	0	12	0	0	0	0.382527	0	0.484916	0	0.260948	0	0.75	0.361772	1	0	0	2	1	0	0	1
18	1	0	26.5124	1	1	0		0	1.17972	0		0	0.7		0	0	0	0	1	0	0	0
64	1	0	12.1653	0	1	0	0.690189	0	0.45146	0	0.0449355	0	0.76	0.0774482	0	0	0	2	2	1	0	0
85	1	0	16.2645	0	1	0	0.0391072	0	-2.19346	1	-3.27182	1	0.79	-3.25083	0	0	0	1	0	0	1	1
54	1	0	13.3223	0	0	0	0.907817	0	-0.306667	0	-1.13563	0	0.78	-1.18332	0	0	0	2	1	0	0	1
176	0	0	12.0661	1	1	0	1.75361	0	1.60159	0	0.992334	0	0.8	0.835728	0	1	0	1	1	0	0	0
423	0	1	12.8264	0	1	0	0.377186	0	1.83211	0	2.09261	0	0.76	2.22476	0	0	1	1	1	1	0	0
659	0	1	12.6612	1	1	0	3.51751	0	3.29581	0	2.16121	0	0.85	1.79138	0	0	1	2	2	1	5	0
467	1	1	16.0992	1	0	0	-0.507905	0	0.383903	0	0.676999	0	0.79	0.951449	0	0	0	2	1	0	5	0
720	0	1	12.0992	0	1	0	2.2725	0	1.97426	0	1.27785	0	0.8	1.059	0	0	1	2	1	0	0	0
326	1	1	24.6612	1	1	0	-2.48182	1	-0.203412	0	1.48664	0	0.8	1.94785	0	0	1	0	1	0	0	0
560	0	1	25.0579	0	1		1.02385	0	1.40858	0	1.11942	0	0.9	1.13719	1	0	1	2	1	1	1	0
122	0	0	20.3306	0	1	0	-0.00796437	0	2.6055	0	3.37012	0	0.83	3.5656	1	0	1	0	1	0	5	1
478	0	1	17.9174	1	1	0	1.42013	0	0.464588	0	-0.441679	0	0.86	-0.484003	0	0	0	1	1	0	0	0
282	1	1	24.0992	1	0	0	-0.392328	0	-0.123988	0	0.0850522	0	0.86	0.166612	0	0	0	1	1	0	0	0
568	0	1	24.2314	0	1		1.26059	0	-0.762471	0	-2.1632	1	0.9	-2.3784	1	0	0	2	1	1	1	0
80	1	0	14.4463	1	1	0	-2.61637	1	-2.19153	1	-1.48617	0	0.72	-0.857916	0	0	0	2	1	0	0	0
394	1	1	15.5372	1	1	0	1.28096	0	-0.377303	0	-1.40187	0	0.83	-1.57365	0	0	0	2	1	0	5	0
657	0	1	11.9339	0	1	0	2.35902	0	2.00747	0	1.27785	0	0.8	1.04435	0	0	1	2	1	0	0	0
235	1	1	17.5868	0	1	0	2.67845	0	-0.538589	0	-2.8971	1	0.88	-3.07961	0	1	0	2	1	0	0	0
126	1	0	11.7025	1	1	0	1.95032	0	1.27288	0	0.468081	0	0.8	0.257069	0	0	0	2	1	0	1	0
341	0	1	16	1	1	1	-1.24257	0	-0.461143	0	-0.0329154	0	0.77	0.402326	1	0	0	0	1	0	5	0
762	1	1	23.438	0	1	0	-1.22379	0	-0.643479	0	-0.182781	0	0.82	0.144166	1	0	0	2	1	1	5	0
437	0	1	14.1818	1	1	0	-0.101119	0	0.49482	0	0.558413	0	0.78	0.7655	0	0	0	1	1	1	5	0
322	1	1	24.5289	0	1	0	0.559915	0	-0.423145	0	-1.13681	0	0.88	-1.19675	0	0	0	2	1	0	0	0
331	1	1	12.3306	1	0	0	0.777497	0	1.1323	0	0.88386	0	0.78	0.935134	0	0	0	0	1	2	5	0
320	1	1	17.4215	1	0	0	-1.38034	0	-0.269855	0	0.334514	0	0.78	0.79489	0	0	0	0	1	0		0
368	0	1	24.562	1	0	0	0.13042	0	0.3052	0	0.286379	0	0.88	0.31687	0	0	0	0	1	0	0	1
206	0	1	20.562	0	1	0	-2.38114	1	-0.201128	0	1.13629	0	0.76	1.73903	0	0	1	1	1	0	1	1
401	0	1	14.1818	1	1	0	-1.30748	0	0.147291	0	0.783468	0	0.75	1.25365	0	0	1	0	1	1	5	0
102	1	0	15.1405	0	0	0	-0.97043	0	-1.54229	0	-1.6959	0	0.75	-1.37879	0	0	0	1	1	1	0	1
461	0	1	15.1736	0	0	0	0.472091	0	-0.20361	0	-0.733218	0	0.79	-0.69176	0	0	0	1	1	0	0	0
359	1	1	24.2975	1	1	0	-2.7238	1	1.67803	0	4	0	0.79	4.48909	1	0	1	1	1	1	0	0
436	1	1	18.876	0	0	0	2.84796	0	1.74869	0	0.308102	0	0.9	0.282362	0	0	0	2	1	1	5	0
737	0	1	23.438	1	0	0	-0.10734	0	-0.176146	0	-0.37807	0	0.87	-0.142827	1	0	0	2	0	0	1	0
691	1	1	18.8099	0	1	0	-0.518384	0	-1.19718	0	-1.47364	0	0.8	-1.28562	0	0	0	1	1	1	0	0
97	1	0	12.1653	0	0	0	2.23818	0	0.618963	0	-0.605285	0	0.8	-0.864263	0	1	0	1	2	1	0	0
328	1	1	18.0826	0	1	0	1.10289	0	0.19616	0	-0.678865	0	0.84	-0.64294	1	0	0	1	1	1	0	0
26	1	0	14.0165	1	0	1	-0.834524	0	0.355176	0	0.773131	0	0.76	1.15217	0	0	1	0	2	2		0
658	1	1	13.6198	0	1	0	0.0212068	0	0.336758	0	0.275582	0	0.76	0.438258	0	0	0	2	1	0	5	0
342	1	1	14.5785	0	1	0	0.72221	0	-0.271418	0	-0.980762	0	0.79	-0.991462	0	0	0	2	1	0	0	0
84	1	0	12.1322	0	1	0	-0.455555	0	-1.27108	0	-1.65399	0	0.73	-1.43076	0	0	0	2	1	0	0	0
376	0	1	15.5372	0	1	0	-0.398115	0	0.23448	0	0.399541	0	0.77	0.635566	1	0	0	1	1	1	5	1
61	1	0	15.1074	0	0	0	1.9565	0	0.701258	0	-0.428201	0	0.83	-0.557047	0	0	0	0	1	1	5	0
615	1	1	24.2314	0	1	0	0.0253833	0	-0.088719	0	-0.239443	0	0.86	-0.204631	1	0	0	2	1	2	0	0
444	0	1	24.2314	1	0	0	0.549282	0	-0.289793	0	-0.874779	0	0.89	-0.945828	0	0	0	1	1	0	0	0
216	1	1	11.6694	1	1	0	1.12114	0	-1.6324	0	-3.06313	1	0.78	-3.24387	0	0	0	2	1	1	0	0
310	0	1	21.8512	0	0	0	-1.11358	0	-0.0220028	0	0.571777	0	0.81	0.905326	1	0	0	2	1	1	0	0
729	1	1	11.405	1	1	0	2.11493	0	2.89691	0	2.39646	0	0.8	2.22914	0	0	1	2	1	0	5	0
591	1	1	21.9174	0	0	0	1.75643	0	3.07179	0	2.83806	0	0.9	2.96159	0	0	1	1	1	1	1	0
755	1	1	18.6446	0	0	0	-1.48427	0	0.831885	0	1.89597	0	0.77	2.33468	1	0	1	2	1	0	0	0
145	1	0	12.4959	0	1	0	2.06901	0	1.54989	0	0.797878	0	0.8	0.601953	0	1	0	1	1	0	0	0
472	0	1	24.2314	1	0	0	0.549282	0	-0.289793	0	-0.874779	0	0.89	-0.945828	0	0	0	2	1	0	0	0
406	1	1	24.0992	0	1	0	-0.248211	0	0.00124812	0	0.104498	0	0.85	0.172767	1	0	0	0	1	1	5	0
2	1	0	26.314	0	1	0	-0.212502	0	-0.68049	0	-0.894079	0	0.87	-0.873303	0	0	0	1	1	0	5	0
617	1	1	12.4298	1	0	0	1.56157	0	0.769754	0	0.0249145	0	0.8	-0.136987	1	0	0	2	1	1	0	0
559	1	1	25.0579	1	1		0.634453	0	1.08206	0	1.01702	0	0.9	0.985714	0	0	0	2	1	1	1	0
115	1	0	12.3636	1	1	0	1.17843	0	1.53526	0	1.19718	0	0.79	1.16696	0	0	1	1	0	0	0	0
575	1	1	21.6529	1	0		0.778084	0	0.947555	0	0.572374	0	0.88	0.713529	0	0	0	2	0	0	1	0
675	0	1	23.1074	1	0	0	-0.34483	0	-0.745375	0	-1.00032	0	0.86	-0.774878	1	0	0	2	1	0	0	0
245	1	1	12.4959	1	1	0	-2.22182	1	-0.248013	0	0.910542	0	0.71	1.44769	0	0	1	2	1	0	0	0
348	0	1	24.2645	1	1	0	-3.36758	1	0.0683203	0	2.3699	0	0.77	3.07908	1	0	1	1	1	1	5	1
82	1	0	12.8926	1	1	0	0.0847736	0	-0.62325	0	-1.0513	0	0.77	-0.925342	1	0	0	2	1	0	0	0
190	0	0	13.686	0	1	0	-0.382502	0	-0.284704	0	-0.340872	0	0.75	-0.106219	0	0	0	0	1	0	0	0
334	0	1	24.4628	1	1	0	0.158206	0	0.523085	0	0.572374	0	0.88	0.607127	0	0	0	1	1	0	1	1
209	0	1	12.2975	0	1	0	1.78411	0	-0.0133212	0	-1.23586	0	0.79	-1.44008	0	0	0	2	1	0	0	0
287	0	1	22.314	1	1	0	-2.14343	1	-1.92452	0	-1.32025	0	0.8	-0.835796	0	0	0	2	1	0	0	0
405	0	1	13.157	1	1	0	-0.0405424	0	0.528924	0	0.549267	0	0.77	0.759027	0	0	0	1	1	0	5	0
276	0	1	19.405	0	0	0	-0.711384	0	0.711949	0	1.27785	0	0.8	1.5634	0	0	1	2	1	1	0	0
434	0	1	13.1901	0	1	0	0.590256	0	0.662591	0	0.399541	0	0.77	0.450717	0	0	0	0	1	0	1	0
255	0	1	18.2479	0	1	0	-2.04322	1	-0.309983	0	0.71171	0	0.75	1.27909	0	0	1	2	1	0	0	1
552	1	1	19.0413	1	0	0	-1.19007	0	-0.975249	0	-0.684026	0	0.8	-0.343859	0	0	0	2	1	0	0	0
735	0	1	18.2479	0	1	0	0.356213	0	1.22892	0	1.28697	0	0.82	1.43045	0	0	1	2	1	0	0	0
266	0	1	14.876	0	1	0	-0.502088	0	0.351789	0	0.609488	0	0.76	0.878083	0	0	0	2	1	0	0	0
36	1	0	16.0992	1	1	0	3.73934	0	0.627985	0	-1.674	0	0.9	-2.06717	0	0	0	2	1	0	0	0
408	0	1	23.5702	0	1	0	0.614682	0	2.23654	0	2.41362	0	0.88	2.62966	0	0	1	1	1	1	0	0
293	0	1	11.9008	1	1	0	1.42076	0	0.350392	0	-0.466152	0	0.79	-0.604733	0	0	0	2	1	0	0	0
316	1	1	15.2727	0	0	0	-1.02089	0	1.71922	0	2.7226	0	0.75	3.11582	0	0	1	2	1	0	0	1
414	1	1	12.9587	1	1	0	1.70343	0	-1.24924	0	-2.83049	1	0.81	-3.18318	0	1	0	1	1	0	5	0
147	0	0	12.4298	1	1	0	3.6472	0	0.235098	0	-1.94674	0	0.85	-2.48005	0	0	0	2	1	0	0	0
485	1	1	14.1818	0	1	0	3.12192	0	-0.378221	0	-2.77423	1	0.85	-3.09533	0	0	0	0	1	1	0	0
12	1	0	23.8678	1	0	0	-0.558024	0	-0.0908409	0	0.0850522	0	0.86	0.384889	0	0	0	1	1	1	5	0
536	1	1	12.4298	1	1	0	3.6472	0	0.235098	0	-1.94674	0	0.85	-2.48005	0	0	0	2	1	0	0	0
455	1	1	16.1653	0	1	0	-0.63623	0	0.517523	0	0.93107	0	0.77	1.21956	0	0	1	2	1	2	5	0
315	1	1	18.7769	0	0	0	-1.18632	0	0.0830648	0	0.722791	0	0.78	1.0925	1	0	1	1	1	2	0	0
587	1	1	13.4545	0	1	0	1.60065	0	2.04237	0	1.72979	0	0.8	1.63692	0	0	1	2	1	0	0	0
651	0	1	13.6198	1	0	0	0.966787	0	-1.48694	0	-2.73996	1	0.8	-2.94599	0	0	0	1	0	0	5	0
37	1	0	15.0744	0	0	0	-0.215974	0	0.0701323	0	0.0626373	0	0.77	0.257838	0	0	0	2	1	0	0	0
251	1	1	12.2645	0	0	0	1.41463	0	0.842748	0	0.186533	0	0.78	0.0787947	0	0	0	2	1	1	0	0
451	1	1	18.4793	1	1	0	1.56582	0	3.62289	0	3.57291	0	0.87	3.5481	0	0	1	0	1	1	5	0
694	0	1	23.8347	0	1	0	1.78146	0	2.10071	0	1.44416	0	0.92	1.56876	1	0	1	2	1	1	5	0
373	0	1	16.1983	1	1	1	-1.31742	0	-0.496583	0	-0.0329154	0	0.77	0.418131	1	0	0	0	1	0	5	0
250	1	1	24.3306	1	1	0	1.17097	0	1.31239	0	0.97129	0	0.91	0.866483	0	0	0	1	2	1	0	0
652	1	1	12.6281	0	1	0	0.852725	0	2.19864	0	2.33597	0	0.77	2.38104	0	0	1	2	1	0	5	0
356	1	1	24.4628	1	1	0	-2.43648	1	-0.17556	0	1.48664	0	0.8	1.94152	1	0	1	0	1	0	0	0
189	0	0	15.8347	0	1	0	0.564907	0	1.93748	0	2.15641	0	0.8	2.24534	1	0	1	0	1	2	0	0
304	1	1	24.1653	1	0	0	-2.36775	1	1.21335	0	3.21627	0	0.8	3.647	0	0	1	1	0	0	0	0
29	1	0	12.9917	0	1	0	-1.60044	0	-1.67093	0	-1.42784	0	0.71	-1.01065	0	0	0	0	1	1	5	0
752	1	1	13.5868	1	1	0	0.168266	0	-0.00448261	0	-0.25139	0	0.78	-0.12718	1	0	0	2	0	0	1	0
219	0	1	21.0248	1	1	0	2.3794	0	0.69914	0	-0.83327	0	0.92	-0.967566	1	0	0	2	2	1	1	0
7	1	0	27.5372	1	1	0	1.51609	0	1.33114	0	0.793853	0	0.95	0.573845	0	0	0	0	1	1	1	0
218	1	1	11.6694	0	1	0	4.45503	0	0.115399	0	-2.77423	1	0.85	-3.28116	0	0	0	0	1	1	0	0
669	0	1	17.3223	1	1	0	-1.34544	0	-1.1534	0	-0.878302	0	0.78	-0.472787	0	0	0	1	0	0	5	0
504	0	1	13.0909	0	0	0	1.77451	0	-0.640606	0	-2.15327	1	0.8	-2.37303	0	1	0	2	1	0	0	0
500	1	1	14.3802	1	0	1	-0.588756	0	1.11481	0	1.60842	0	0.77	1.95106	0	0	1	1	1	1	5	0
30	1	0	12.5289	0	1	0	2.05232	0	1.17778	0	0.286737	0	0.8	0.0811887	1	0	0	1	1	0	5	0
486	0	1	23.5372	1	1	0	1.51585	0	0.314993	0	-0.83327	0	0.92	-0.851886	1	0	0	2	2	1	1	0
214	0	1	14.1157	0	0	0	2.78247	0	0.648065	0	-1.01401	0	0.84	-1.26091	0	0	0	0	1	1	0	0
183	1	0	12.6612	0	1	0	1.98593	0	1.51775	0	0.797878	0	0.8	0.616404	0	0	0	1	1	1	0	0
56	1	0	24.8595	0	1	0	-1.06006	0	-0.471541	0	0.0971403	0	0.83	0.226479	0	0	0	2	1	1	5	0
407	0	1	12.3967	0	0	0	-0.576461	0	-0.502101	0	-0.517387	0	0.73	-0.252129	0	1	0	1	1	0	5	0
740	0	1	23.3719	1	0	0	-0.41972	0	-0.783256	0	-1.00032	0	0.86	-0.764265	1	0	0	2	1	0	0	0
76	1	1	25.3554	1	1	0	1.50736	0	1.03927	0	0.370895	0	0.93	0.175369	0	1	0	0	1	0	5	0
52	1	0	15.3388	1	1	0	0.192218	0	-0.340865	0	-0.684026	0	0.8	-0.620977	1	0	0	2	1	0	1	0
139	1	0	13.4215	1	1	0	-1.38915	0	1.14773	0	2.09927	0	0.74	2.58474	0	0	1	2	1	0	0	0
193	0	0	13.0909	0	0	0	1.77451	0	-0.640606	0	-2.15327	1	0.8	-2.37303	0	1	0	1	1	0	0	0
427	1	1	12.595	1	0	0	-0.602608	0	0.990729	0	1.44316	0	0.75	1.78585	0	0	1	1	0	0	5	0
553	0	1	21.0579	1	0	0	-1.80295	0	0.693895	0	1.95386	0	0.8	2.47485	0	0	1	2	1	0	0	0
577	1	1	12.0992	0	1		1.49742	0	0.875843	0	0.186533	0	0.78	0.064097	0	0	0	2	1	0	0	1
110	1	0	11.8678	1	1	0	1.86032	0	-0.606053	0	-2.00343	1	0.8	-2.31406	1	0	0	0	1	0	5	1
642	1	1	23.3388	0	0	0	0.368624	0	1.08254	0	0.980374	0	0.87	1.21608	0	0	1	2	1	0	5	0
133	1	0	12.7934	1	1	0	-0.695545	0	0.604953	0	1.00902	0	0.75	1.36106	0	0	1	0	1	1	1	0
585	1	1	24.3636	1	1	0	0.836039	0	0.537431	0	0.109105	0	0.9	0.0357263	0	0	0	1	1	1	0	0
101	1	0	12.3306	0	0	0	0.224837	0	2.25667	0	2.7226	0	0.75	2.90356	0	0	1	2	1	0	0	1
51	1	0	23.1736	0	1	0	0.416121	0	1.10652	0	0.980374	0	0.87	1.21203	0	0	1	2	0	0	0	0
118	1	0	16.9587	1	1	0	-1.59439	0	-0.629818	0	-0.0329154	0	0.77	0.476985	1	0	0	1	1	1		0
629	0	1	23.1736	1	0	0	-0.0309035	0	-0.137608	0	-0.37807	0	0.87	-0.153517	1	0	0	2	0	0	1	0
606	1	1	15.5372	1	1	1	0.108698	0	1.27951	0	1.48664	0	0.8	1.6477	0	0	1	1	1	0	0	0
477	0	1	13.8843	0	1	0	1.7743	0	0.532241	0	-0.495084	0	0.81	-0.652745	0	0	0	1	0	0	5	0
428	0	1	14.1488	0	1	0	1.65227	0	-0.016416	0	-1.20885	0	0.81	-1.36559	0	0	0	1	0	0	1	0
506	1	1	14.9091	1	1	0	-0.414777	0	-1.21505	0	-1.55149	0	0.78	-1.37355	0	0	0	2	1	0	5	0
588	1	1	21.0248	1	1	0	-0.0548399	0	1.38271	0	1.7403	0	0.85	1.96593	0	0	1	2	1	0	5	0
412	0	1	24.9256	1	1	0	0.672251	0	1.16309	0	1.10298	0	0.9	1.06879	0	0	1	2	1	1		0
448	1	1	18.4793	1	1	0	1.56582	0	-0.447318	0	-1.86681	0	0.87	-1.97183	0	0	0	0	1	1	5	0
763	1	1	21.0248	1	1	0	-0.0548399	0	1.38271	0	1.7403	0	0.85	1.96593	0	0	1	2	1	0	5	0
695	1	1	12.9917	0	0		-0.0790433	0	0.288425	0	0.260948	0	0.75	0.448858	0	0	0	2	0	0	5	0
374	0	1	15.7025	1	1	1	-1.12819	0	-0.407433	0	-0.0329154	0	0.77	0.378273	1	0	0	0	1	0	5	0
471	0	1	14.1488	0	0	0	2.76658	0	1.23984	0	-0.148745	0	0.84	-0.368293	1	0	0	2	1	0	5	0
58	1	0	23.5702	1	1	0	-0.145258	0	-0.0478545	0	-0.168701	0	0.87	0.0789373	1	0	0	1	1	1	1	0
377	1	0	12.5289	0	1	1	0.132089	0	0.378901	0	0.260948	0	0.75	0.40865	1	0	0	0	1	1	1	0
626	0	1	15.1405	1	1	0	3.03519	0	1.35547	0	-0.168701	0	0.87	-0.450175	0	0	0	2	0	1	5	0
247	1	1	12.9917	0	1	0	1.44236	0	1.45433	0	1.01539	0	0.79	0.924133	0	0	0	2	1	0	0	0
57	1	0	13.2893	0	1	0	-0.589024	0	-1.1853	0	-1.45671	0	0.74	-1.20179	0	0	0	1	1	1	5	0
137	1	0	12.3636	0	1	0	2.13619	0	0.823038	0	-0.25923	0	0.8	-0.492576	1	0	0	1	1	1	5	0
643	1	1	12.1983	0	0	0	-1.25947	0	-0.461729	0	-0.0101404	0	0.71	0.361369	0	0	0	2	1	1	0	0
319	1	1	16.0661	1	1	0	-1.26764	0	-0.936235	0	-0.655846	0	0.77	-0.238469	0	1	0	0	0	1	5	0
160	0	0	14.843	1	1	0	1.19918	0	1.02423	0	0.559027	0	0.82	0.479436	0	0	0	0	0	1	5	0
725	0	1	18.5455	1	1	0	2.27273	0	-0.0409045	0	-1.78019	0	0.89	-1.95274	0	1	0	2	1	2	0	1
726	0	1	13.5868	0	0	0	-0.340094	0	0.0888671	0	0.144139	0	0.75	0.380053	0	0	0	2	1	0	0	0
314	1	1	15.438	1	1	0	-1.0244	0	0.505912	0	1.09512	0	0.77	1.51472	0	0	1	1	1	0	5	0
73	1	0	28.9587	1	0	0	-1.83748	0	-0.0714197	0	1.29776	0	0.85	1.58759	0	0	1	2	1	1	0	0
151	1	0	12.9917	0	1	0	0.681657	0	0.700549	0	0.399541	0	0.77	0.433793	0	0	0	1	1	1	5	0
411	0	1	13.0248	1	0	0	0.433781	0	0.729389	0	0.558413	0	0.78	0.662246	0	0	0	2	2	0	0	0
41	1	0	13.3223	0	0	0	1.66335	0	-0.215091	0	-1.47364	0	0.8	-1.65633	0	0	0	0	1	2	1	0
481	0	1	17.6529	0	0	0	1.26484	0	0.0326083	0	-1.01401	0	0.84	-1.01502	0	0	0	1	1	1	0	0
764	1	1	24.3306	0	1	0	-0.00141604	0	0.308928	0	0.33624	0	0.86	0.401401	0	0	0	1	1	0	0	0
203	1	1	19.3719	1	1	0	1.22405	0	-0.591877	0	-1.86681	0	0.87	-1.91441	1	0	0	2	1	1	0	0
144	1	0	13.9835	0	1		2.10098	0	0.513912	0	-0.738849	0	0.82	-0.93352	0	0	0	2	1	1	0	0
700	1	1	24.1322	0	0	0	0.980146	0	-0.988993	0	-2.27534	1	0.89	-2.46848	0	0	0	2	1	0	0	0
232	1	1	21.1901	0	1	0	0.050185	0	2.47957	0	3.15401	0	0.84	3.36095	0	0	1	2	1	1	0	0
268	0	1	19.9339	0	1	0	-2.53854	1	-0.585186	0	0.71171	0	0.75	1.36343	0	0	1	2	1	0	0	1
69	1	0	28.3967	0	0	0	-1.28063	0	-0.254195	0	0.577339	0	0.85	0.752997	0	0	0	1	1	1	0	0
106	1	0	12.0992	1	1		0.89599	0	-0.162948	0	-0.878302	0	0.78	-0.916864	0	1	0	2	1	1	0	0
263	0	1	19.7686	1	1	0	0.721334	0	2.22971	0	2.33391	0	0.86	2.45066	0	0	1	2	1	0	0	0
708	1	1	19.6033	0	0	0	0.563122	0	1.63712	0	1.67887	0	0.84	1.84039	0	0	1	2	1	0	0	0
98	1	0	12.4298	1	1	0	1.56157	0	1.11062	0	0.468081	0	0.8	0.324713	0	0	0	2	1	1	5	0
531	1	1	12.3967	0	1	0	0.578882	0	0.145544	0	-0.313926	0	0.76	-0.268321	1	0	0	2	1	1	0	0
223	1	1	19.9669	1	1	0	-0.771095	0	-0.271136	0	0.0251261	0	0.82	0.299861	0	0	0	1	1	0	5	1
365	0	1	24.6612	1	1	0	0.102742	0	0.494542	0	0.572374	0	0.88	0.613136	0	0	0	1	1	0	1	1
306	1	1	15.9669	0	1	1	-0.204031	0	1.60129	0	2.14019	0	0.78	2.35639	0	0	1	1	1	1	0	0
656	1	1	12.2975	0	1	0	4.87146	0	2.5754	0	0.551013	0	0.87	0.135523	0	1	0	2	1	1	0	0
715	1	1	12.9917	1	1	0	0.0374771	0	1.79174	0	2.09241	0	0.77	2.32664	0	0	1	2	1	0	5	0
635	1	1	19.2066	1	0	0	-1.24368	0	-0.565425	0	-0.0894223	0	0.8	0.288942	0	1	0	2	1	1	5	0
661	1	1	14.1818	0	0	0	1.26598	0	1.23387	0	0.797878	0	0.8	0.743373	0	0	0	2	1	0	5	0
541	1	1	13.124	0	0	1	1.3792	0	1.42923	0	1.01539	0	0.79	0.93535	0	0	0	1	2	1	5	0
343	0	1	23.5702	1	0	0	-1.46571	0	-0.811454	0	-0.216052	0	0.83	0.169963	0	0	0	2	1	0	0	0
79	1	0	14.9421	1	0	0	-1.22004	0	0.176195	0	0.773131	0	0.76	1.231	0	0	1	1	1	1		1
660	1	1	14.9091	1	0	0	-0.018803	0	-0.260847	0	-0.466152	0	0.79	-0.334198	1	0	0	2	1	1	0	0
336	0	1	14.314	1	1	0	0.642601	0	1.20719	0	1.09349	0	0.8	1.1423	1	0	1	2	1	1	5	0
677	1	1	17.5868	0	1	0	-0.0981415	0	1.33473	0	1.72979	0	0.8	1.92289	1	0	1	2	0	0		0
31	1	0	17.7521	1	1	0	1.11407	0	1.24524	0	0.831587	0	0.85	0.848887	0	0	0	1	1	1	5	0
539	0	1	16.4628	1	0	0	-4.09727	1	-0.54339	0	1.80899	0	0.7	2.69438	0	0	1	2	1	2	0	0
155	1	0	12.1653	0	1	0	0.303192	0	0.192074	0	-0.0947204	0	0.75	0.0138741	1	0	0	1	1	1	5	0
107	1	0	14.1488	0	0	0	0.909386	0	0.483516	0	-0.0322872	0	0.79	-0.0519493	0	1	0	1	1	1	5	0
221	1	1	13.2231	0	1	1	-0.181925	0	-0.195938	0	-0.340872	0	0.75	-0.144985	0	0	0	1	1	0	5	0
547	0	1	20.6612	1	0	0	-0.988347	0	0.757147	0	1.53824	0	0.82	1.88797	0	0	1	2	1	0	0	0
421	0	1	22.6116	1	1	0	-2.89292	1	-2.94854	1	-2.27724	1	0.78	-1.64667	0	0	0	2	1	1	0	0
198	1	0	12.9256	1	1	0	-0.343871	0	0.130449	0	0.194472	0	0.76	0.46027	1	0	0	1	1	1	5	0
540	1	1	12.9917	1	1	0	0.0374771	0	0.11673	0	-0.0329154	0	0.77	0.142282	0	0	0	2	1	1	5	0
258	0	1	15.9008	1	1	0	-0.429213	0	-0.443314	0	-0.466152	0	0.79	-0.251693	0	0	0	2	1	0	0	0
683	1	1	18.1818	0	0	0	-0.649856	0	0.55329	0	1.01539	0	0.79	1.29117	1	0	1	2	1	1	5	0
521	0	1	12	0	0	0	0.382527	0	0.484916	0	0.260948	0	0.75	0.361772	1	0	0	2	1	0	0	1
104	1	0	21.9174	0	0	0	-1.453	0	1.17034	0	2.40122	0	0.8	2.77761	0	0	1	2	1	0	1	0
743	0	1	20.4628	1	0	0	-0.223532	0	-0.678678	0	-0.931597	0	0.84	-0.771272	1	0	0	2	1	1	0	0
239	1	1	15.5041	1	0	0	4.81485	0	-0.371251	0	-3.79414	1	0.92	-4.48257	0	0	0	2	1	1	1	0
680	1	1	16.6281	1	0	0	-0.712388	0	-1.03474	0	-1.09743	0	0.79	-0.857315	0	0	0	2	1	1	1	0
370	0	1	22.9091	1	0	0	-1.29133	0	-0.716759	0	-0.216052	0	0.83	0.143012	0	0	0	2	1	0	0	0
158	0	0	20.3306	0	1	0	-0.00796437	0	2.6055	0	3.37012	0	0.83	3.5656	1	0	1	0	1	0	5	1
590	1	1	25.0579	0	1	0	-0.499933	0	0.204196	0	0.577339	0	0.85	0.686548	0	1	0	2	1	0	1	0
509	1	1	17.7851	0	0	0	-0.514301	0	-1.02283	0	-1.23586	0	0.79	-1.03647	0	1	0	0	1	0	0	0
67	1	0	20.6612	1	0	0	0.0629268	0	0.0154068	0	-0.181127	0	0.85	-0.00796327	0	0	0	1	1	1	5	0
483	1	1	14.1818	1	1	0	-0.101119	0	-2.14194	1	-3.06313	1	0.78	-3.03932	0	0	0	2	1	1	0	0
48	1	0	28.4628	1	0	0	-1.73865	0	1.20965	0	2.94507	0	0.85	3.2401	0	1	1	1	1	1	5	0
249	1	1	12.5289	1	1	0	0.677498	0	-0.255004	0	-0.878302	0	0.78	-0.877472	0	0	0	2	1	0	0	0
257	1	1	11.8347	1	1	0	1.03375	0	1.65405	0	1.40044	0	0.78	1.42309	0	0	1	0	1	1	0	0
673	0	1	19.3388	1	0	0	0.515651	0	0.607834	0	0.339497	0	0.85	0.451223	0	1	0	2	1	0	5	0
4	1	0	16.6942	1	1	0	1.54981	0	-0.143602	0	-1.32048	0	0.85	-1.46675	0	0	0	2	1	1	0	0
149	0	0	13.3554	0	1	0	0.13758	0	-0.69238	0	-1.21806	0	0.76	-1.10973	1	0	0	1	1	0	0	0
640	1	1	18.7769	0	1	0	-1.86519	0	2.83753	0	4.70219	0	0.76		1	0	0	0	1	1	0	0
499	1	1	14.2479	0	1	0	-0.987752	0	0.302846	0	0.819564	0	0.74	1.19463	1	0	1	2	1	0	0	0
533	1	1	13.9174	0	1		2.13212	0	0.526124	0	-0.738849	0	0.82	-0.938842	0	0	0	2	1	1	0	0
432	0	1	14.9752	1	0	0		0	-2.28881	1		0	0.96		0	1	0	1	1	0	0	0
665	1	1	12	1	1	0	1.78904	0	2.01104	0	1.48664	0	0.8	1.34197	0	0	1	2	1	0	5	0
119	1	0	13.6529	0	1	0	1.50769	0	0.887964	0	0.180458	0	0.8	0.0683609	0	0	0	2	1	0	0	0
456	1	1	13.4545	0	1	0	0.470421	0	-0.240514	0	-0.782755	0	0.77	-0.735787	0	0	0	0	1	1	5	0
259	1	1	14.5455	1	1	0	-1.0581	0	-1.1473	0	-1.08955	0	0.76	-0.724278	0	0	0	2	1	1	0	0
363	0	1	14.314	0	1	1	-0.644026	0	-0.778858	0	-0.856655	0	0.75	-0.581996	0	0	0	1	0	0	1	0
288	0	1	13.7851	0	1	0	-0.0503987	0	0.550639	0	0.609488	0	0.76	0.792305	0	0	0	2	1	0	0	0
335	0	1	24.6281	1	1	0	0.111954	0	0.499284	0	0.572374	0	0.88	0.612134	0	0	0	1	1	0	1	1
34	1	0	18.0165	0	1	0	1.12752	0	0.93237	0	0.34905	0	0.84	0.410218	0	1	0	1	1	1	0	0
489	0	1	15.6694	0	1	0	1.71213	0	-0.0356773	0	-1.345	0	0.83	-1.4623	1	0	0	2	1	2	5	0
712	1	1	15.5702	1	0	0	2.82825	0	1.64569	0	0.334695	0	0.87	0.104079	0	0	0	2	2	2	5	0
194	0	0	12.562	1	1	0	1.49294	0	1.88513	0	1.48664	0	0.8	1.39322	0	0	1	2	1	0	0	0
253	0	1	12.595	0	1	0	0.484992	0	0.777457	0	0.609488	0	0.76	0.691702	0	0	0	2	1	0	0	0
391	1	1	19.0744	0	0	0	-1.28022	0	0.409998	0	1.22484	0	0.78	1.61392	0	0	1	2	1	0	1	0
55	1	0	12.9917	0	0	0	-0.839744	0	-0.818603	0	-0.787256	0	0.73	-0.475031	0	0	0	1	1	0	0	0
361	1	1	12.562	1	0	0	0.660971	0	1.08192	0	0.88386	0	0.78	0.956409	0	0	0	0	1	2	5	0
227	1	1	19.3058	1	0	0	-2.35735	1	-1.95783	0	-1.32476	0	0.77	-0.703771	0	0	0	2	1	0	0	0
399	0	1	22.5785	0	1	1	-0.995418	0	-0.132385	0	0.337815	0	0.82	0.653577	0	0	0	1	1	0	5	0
460	0	1	14.1818	0	1	0	3.49311	0	1.58102	0	-0.140621	0	0.86	-0.395931	1	0	0	2	1	0		0
300	0	1	18.0165	1	1	0	-0.101979	0	0.447619	0	0.559027	0	0.82	0.726233	0	0	0	0	0	1	5	0
609	0	1	14.314	1	1	1	-2.16438	1	-1.62027	0	-1.01623	0	0.73	-0.443685	0	0	0	2	1	2		1
369	0	1	24.6942	1	0	0	1.38498	0	1.55939	0	1.17656	0	0.92	1.03386	0	0	1	0	1	0	0	1
502	0	1	13.4876	0	1	0	-0.297375	0	-0.24685	0	-0.340872	0	0.75	-0.122713	0	0	0	1	1	0	0	0
751	1	1	13.9835	0	0	0	1.35559	0	1.61677	0	1.27785	0	0.8	1.21794	1	0	1	2	1	0	0	0
124	0	0	14.3802	1	1	0	-3.39181	1	1.87942	0	4.27765	0	0.7	4.94769	0	0	1	2	1	0	0	0
748	1	1	18.7438	0	0		-0.49649	0	0.0884148	0	0.286737	0	0.8	0.525484	0	1	0	2	1	1	5	0
65	1	0	13.719	0	1	0	0.727564	0	1.99373	0	2.14019	0	0.78	2.19685	0	0	1	1	1	0	5	0
534	1	1	12.4959	0	1	0	2.06901	0	1.54989	0	0.797878	0	0.8	0.601953	0	1	0	2	1	0	0	0
260	1	1	23.7686	1	0	0	-0.530583	0	-0.0765586	0	0.0850522	0	0.86	0.380882	0	0	0	1	1	0	0	0
210	0	1	11.3719	0	1	0	3.05459	0	1.02547	0	-0.495084	0	0.81	-0.868989	0	0	0	0	0	0	5	0
556	1	1	25.0579	1	0		-0.647826	0	-1.01696	0	-1.00032	0	0.86	-0.939006	0	0	0	2	0	0	1	0
647	1	1	16.6612	1	0	0	-1.10638	0	-0.946143	0	-0.749399	0	0.78	-0.387992	0	0	0	2	1	1	1	0
185	1	0	16	1	0	0	-0.855633	0	-0.643739	0	-0.496959	0	0.78	-0.176449	0	0	0	0	0	0	5	0
5	1	0	14.4463	1	0	0	2.58203	0	-1.12861	0	-3.33639	1	0.85	-3.78592	0	0	0	2	1	0	1	0
550	1	1	24.7603	1	0		-0.569711	0	-0.97673	0	-1.00032	0	0.86	-0.949307	0	0	0	2	0	0	1	0
410	1	1	14.1157	1	0	0	-2.48786	1	-1.26911	0	-0.302942	0	0.72	0.323593	0	0	0	1	0	0	5	0
701	0	1	19.2066	1	1	0	2.00854	0		0		0	0.89		0	0	0	2	2	1	5	0
690	0	1	14.9421	1	1	0	3.13263	0	1.39392	0	-0.168701	0	0.87	-0.46698	0	0	0	2	0	1	5	0
339	0	1	24.562	1	0	0	1.42523	0	1.57915	0	1.17656	0	0.92	1.02986	0	0	1	0	1	0	0	1
230	1	1	23.8678	1	1	0	-0.558024	0	0.940033	0	1.50229	0	0.86	1.81584	1	0	1	2	1	1	0	0
603	1	1	25.3884	1	0		-1.36933	0	-0.0187563	0	0.981358	0	0.84	1.19853	0	0	1	2	1	0	0	1
696	1	1	14.0165	1	0	0	-0.834524	0	-0.0896358	0	0.194472	0	0.76	0.558402	0	1	0	2	1	1	0	0
682	1	1	23.5372	1	0	0	2.83717	0	2.47668	0	1.3595	0	0.96	1.20734	0	0	1	2	1	0	0	0
622	1	1	15.7686	0	0	0	-0.127529	0	0.193909	0	0.186533	0	0.78	0.36138	0	0	0	2	1	1	5	0
141	0	0	13.4545	1	1	0	-0.995176	0	-1.45446	0	-1.55509	0	0.75	-1.21948	0	1	0	1	1	0	0	0
25	1	0	15.2397	1	1	0	-0.552022	0	-0.322529	0	-0.25139	0	0.78	0.0168847	1	0	0	0	1	0	5	0
338	0	1	24.7603	1	0	0	0.0751712	0	0.276964	0	0.286379	0	0.88	0.322942	0	0	0	0	1	0	0	1
180	1	0	12.9917	1	1	0	-1.19933	0	-1.36191	0	-1.29125	0	0.74	-0.911889	0	1	0	0	2	2	5	0
465	0	1	22.0496	1	1	0	1.33035	0	2.14924	0	1.84124	0	0.9	1.91028	0	0	1	1	1	0	5	0
146	0	0	13.5537	1	0	0	-3.07612	1	0.873657	0	2.88719	0	0.7	3.53589	1	0	1	2	1	0	0	0
409	1	1	12.8264	0	1	0	-1.14946	0	-0.118576	0	0.364009	0	0.72	0.742623	0	1	0	0	1	1	0	0
153	0	0	12.8595	1	1	0	0.514027	0	0.59101	0	0.334514	0	0.78	0.415221	0	0	0	1	1	0	5	0
283	0	1	19.2066	0	1	0	-2.33164	1	-0.384761	0	0.820478	0	0.75	1.43835	1	0	1	2	1	1	0	0
225	1	1	19.5372	0	1	0	-1.75746	0	-0.0390516	0	0.93107	0	0.77	1.41257	1	0	1	2	1	0	0	0
599	1	1	13.2562	0	1	0	1.69492	0	1.75073	0	1.27785	0	0.8	1.1586	0	0	1	0	1	1	5	0
43	1	0	14.7107	0	0	0	-0.06869	0	0.381458	0	0.399541	0	0.77	0.573973	0	0	0	1	1	0	0	0
269	1	1	11.8347	0	0	0	2.41142	0	1.68165	0	0.797878	0	0.8	0.543209	1	0	0	2	1	0	1	0
105	1	0	15.9008	0	0	0	-0.178643	0	0.932525	0	1.22484	0	0.78	1.42724	0	0	1	2	1	0	1	0
564	1	1	18.5785	0	1	0	-0.782031	0	-0.282144	0	-0.0322872	0	0.79	0.247638	1	0	0	2	0	0	0	0
120	1	0	13.4215	0	1	0		0	0.618723	0	-2.75671	1	0.9	-3.26402	1	0	0	1	1	0	5	0
154	1	0	12.0992	1	0	0	-1.62389	0	0.121536	0	0.986358	0	0.72	1.44868	0	1	1	1	0	0	5	0
387	1	1	15.8347	1	1	0	-0.402739	0	0.836131	0	1.19718	0	0.79	1.46506	0	0	1	1	0	0	0	0
243	1	1	22.0165	1	1	0	-2.06547	1	-0.19288	0	0.992334	0	0.8	1.55475	0	0	1	1	1	1	0	0
103	1	0	15.1405	0	0	0	-0.606392	0	0.304609	0	0.609488	0	0.76	0.89785	0	0	0	1	2	1	5	1
267	0	1	17.9174	0	0	0	-0.214961	0	0.948357	0	1.27785	0	0.8	1.48599	0	0	1	2	1	1	0	0
40	1	0	21.6529	1	1	0	-1.62466	0	0.947555	0	2.19748	0	0.81	2.66385	0	0	1	1	1	1	0	0
608	0	1	11.7025	0	1	1	-0.253786	0	-0.655675	0	-0.925588	0	0.73	-0.728716	0	0	0	2	1	2		1
623	1	1	14.1818	0	0	0	0.523599	0	0.477459	0	0.186533	0	0.78	0.241304	0	0	0	2	1	1	5	0
452	1	1	19.9339	0	1	0	0.119899	0	-1.10714	0	-1.84362	0	0.83	-1.73722	0	0	0	1	1	0	0	0
261	0	1	18.1488	0	1	0	-2.01233	1	-0.211197	0	0.820478	0	0.75	1.3831	1	0	1	2	1	1	0	0
112	1	0	14.2149	0	1	0	-0.232592	0	-0.115835	0	-0.192528	0	0.76	0.00900648	0	0	0	2	1	1	1	0
613	1	1	12.562	1	1	0	0.660971	0	0.388276	0	-0.0123728	0	0.78	0.0277423	1	0	0	2	2	1	0	0
520	1	1	13.9835	0	1	0	0.610195	0	1.9457	0	2.14019	0	0.78	2.21715	0	0	1	1	1	1	5	0
621	0	1	24.2645	0	1	0	-1.21811	0	0.318514	0	1.28697	0	0.82	1.47576	0	0	1	2	1	1	0	0
565	1	1	12.3636	1	0		4.10231	0	1.12506	0	-1.00032	0	0.86	-1.52589	0	0	0	2	0	0	1	0
327	1	1	11.9008	0	0	0	0.819769	0	2.3425	0	2.52868	0	0.76	2.5944	0	0	1	2	1	0	0	0
689	1	1	20.1653	1	1	1	0.582283	0	0.473178	0	0.0850522	0	0.86	0.207534	0	0	0	2	1	1	0	0
28	1	0	13.5537	0	1	0	1.55401	0	0.00822443	0	-1.09043	0	0.8	-1.24379	1	0	0	2	1	1	0	0
616	1	1	13.3223	1	0	0	1.11072	0	0.581662	0	0.0249145	0	0.8	-0.0550177	1	0	0	2	1	1	0	0
704	1	1	18.3802	0	0	0	0.651377	0	-0.0877335	0	-0.76032	0	0.83	-0.686108	1	0	0	2	1	0	0	0
535	0	1	13.5537	1	0	0	-0.223882	0	0.873657	0	1.09512	0	0.77	1.35586	1	0	1	2	1	0	0	0
353	0	1	24.0661	1	1	0	-4.30598	1	-2.73996	1	-0.720407	0	0.74	0.187358	0	0	0	2	1	0	0	1
447	1	1	13.4545	0	1	0	0.470421	0	-0.240514	0	-0.782755	0	0.77	-0.735787	0	0	0	0	1	1	5	0
290	0	1	18.7438	0	1	0	-2.1947	1	-0.391838	0	0.71171	0	0.75	1.30566	0	0	1	2	1	0	0	1
433	0	1	13.5207	0	0	0	1.19329	0	-0.724486	0	-1.90943	0	0.79	-2.0297	1	0	0	0	1	0		0
281	1	1	16.1653	1	1	0	-1.69059	0	-1.44106	0	-1.08955	0	0.76	-0.589421	0	0	0	2	1	1	0	0
595	1	1	13.6198	1	0	0	0.152988	0	0.258653	0	0.104772	0	0.78	0.245993	1	0	0	2	1	0	5	0
308	1	1	22.9091	1	1	0	2.0536	0	-3.74786	1		0	0.93		0	0	0	2	1	1	0	0
196	0	0	13.124	1	0	1	0.386121	0	-1.7136	0	-2.74101	1	0.78	-2.78401	0	0	0	1	1	0	0	0
360	1	1	12.6612	1	0	0	0.611632	0	1.06054	0	0.88386	0	0.78	0.965496	0	0	0	0	1	2	5	0
89	1	0	13.4876	0	0	0	-0.297375	0	-0.916152	0	-1.26579	0	0.75	-1.06703	1	0	0	1	2	1	0	0
143	1	0	13.9504	0	1	0	-0.494097	0	1.27582	0	1.8314	0	0.75	2.12435	0	0	1	0	1	1	0	0
438	0	1	14.1818	0	1	0	3.49311	0	1.58102	0	-0.140621	0	0.86	-0.395931	1	0	0	1	1	0		0
527	0	1	18.2479	1	0		-0.1862	0	0.939948	0	1.25592	0	0.82	1.45727	0	1	1	2	1	0	5	0
127	0	0	12.1983	1	1	0	0.42584	0	-1.09109	0	-1.89715	0	0.77	-1.87154	1	0	0	2	1	0	5	0
719	1	1	12.5289	0	1	0	4.74063	0	2.53006	0	0.551013	0	0.87	0.15594	0	1	0	2	1	1	0	0
168	1	0	11.3388	1	1	0	2.15197	0	0.927004	0	-0.0894223	0	0.8	-0.357538	0	0	0	0	1	1	0	0
716	1	1	13.7851	0	0	0	-0.0503987	0	0.550639	0	0.609488	0	0.76	0.792305	0	0	0	2	1	0	0	1
555	1	1	12.9917	0	1	0	-0.0790433	0	1.45433	0	1.8314	0	0.75	2.04846	1	0	1	2	0	0	0	0
75	1	0	12.0992	1	1	0	0.89599	0	-0.162948	0	-0.878302	0	0.78	-0.916864	0	0	0	0	1	1	1	0
337	0	1	14.2149	1	1	0	4.30449	0	1.22695	0	-1.09319	0	0.89	-1.5666	1	0	0	2	1	1	5	0
344	0	1	15.1736	1	1	1	-0.918597	0	-0.310262	0	-0.0329154	0	0.77	0.334526	1	0	0	0	1	0	5	0
195	1	0	17.7851	0	0	0	-0.514301	0	-1.02283	0	-1.23586	0	0.79	-1.03647	0	1	0	0	1	0	0	0
20	1	0	28.3306	1	0	0	-1.40983	0	-1.42899	0	-1.00032	0	0.86	-0.82981	0	0	0	2	1	1		0
612	1	1	13.4876	1	1	0	0.214324	0	0.196206	0	-0.0123728	0	0.78	0.112441	1	0	0	2	2	1	0	0
579	1	1	22.876	0	0	0	0.186989	0	0.521986	0	0.33624	0	0.86	0.568989	0	0	0	2	1	0	1	0
463	0	1	23.438	0	0	0	0.0274427	0	0.634774	0	0.609364	0	0.86	0.861545	0	0	0	0	1	1	5	0
386	1	1	15.7355	1	1	0	-3.0866	1	-0.877203	0	0.618931	0	0.72	1.39182	0	0	1	0	1	0	0	0
638	1	1	22.9752	1	0	0	-2.64533	1	-2.01762	1	-1.09743	0	0.79	-0.473159	0	0	0	2	1	0	0	1
732	1	1	12.9587	1	0	0	-1.18446	0	-0.836665	0	-0.583095	0	0.74	-0.185192	0	0	0	2	1	0	5	0
627	0	1	12.2314	1	0	0	1.24688	0	0.277872	0	-0.466152	0	0.79	-0.574177	0	0	0	2	1	0	5	0
709	1	1	22.3471	0	0	0	-0.294542	0	-0.477712	0	-0.678865	0	0.84	-0.45312	0	0	0	2	1	0	0	0
312	0	1	18.6446	0	0	0	-0.463475	0	1.16614	0	1.72979	0	0.8	1.97993	0	0	1	1	1	0	5	1
88	1	0	26.4463	1	1	0	0.258548	0	1.48068	0	1.84124	0	0.9	1.858	0	0	1	1	1	1	0	0
47	1	0	13.3223	1	0	1	-1.75535	0	1.48824	0	2.74259	0	0.73	3.27299	0	1	1	0	1	1	0	0
400	0	1	22.5785	0	1	0	-0.995418	0	3.19279	0	4.78476	0	0.82		0	0	0	1	1	0	0	0
538	0	1	13.3554	0	1	0	0.13758	0	-0.69238	0	-1.21806	0	0.76	-1.10973	1	0	0	2	1	0	0	1
321	0	1	14.3802	1	1	0	-1.79007	0	-1.2172	0	-0.720407	0	0.74	-0.198908	0	0	0	2	1	0	0	0
496	1	1	16	1	0	0	-0.855633	0	-0.643739	0	-0.496959	0	0.78	-0.176449	0	0	0	1	0	0	5	0
111	1	0	12.7934	0	1	0	1.15632	0	0.738818	0	0.186533	0	0.78	0.125246	0	0	0	2	0	0	1	0
86	1	0	19.2727	0	0	0	-0.332768	0	1.06779	0	1.51229	0	0.81	1.74709	0	0	1	0	1	0	0	0
9	1	0	18.8099	1	0	0	-2.20717	1	-0.760925	0	0.204583	0	0.77	0.85208	0	1	0	2	1	0	5	0
162	1	0	13.4215	0	1	0		0	0.618723	0	-4.5687	1	0.98		1	0	0	1	1	0	5	0
14	1	0	18.0165	0	1	0	1.47178	0	1.88279	0	1.44599	0	0.85	1.50619	0	0	1	1	1	1	0	0
602	0	1	14.6116	1	0	0	-3.4763	1	-1.1597	0	0.574228	0	0.7	1.32699	1	0	1	2	1	1	0	0
237	1	1	23.0413	1	0	0	-1.66039	0	0.73323	0	1.989	0	0.82	2.44574	0	1	1	2	1	1	5	1
38	1	0	26.5455	1	1	0	-1.32551	0	-1.21126	0	-0.73329	0	0.85	-0.579435	0	0	0	1	1	1	0	0
515	1	1	11.7025	1	1	0	1.95032	0	1.27288	0	0.468081	0	0.8	0.257069	0	0	0	2	1	0	1	0
469	0	1	14.1818	1	1	0	3.11584	0	1.15423	0	-0.441679	0	0.86	-0.783208	1	0	0	2	1	0	5	0
295	1	1	13.9504	1	1	0	0.00223513	0	0.625645	0	0.668252	0	0.78	0.858642	1	0	0	0	2	2	0	0

## Sheet: label
id	n1	q18	tuoi_thang	q2moi	q9moi	thunhap_gr	zha	thapcoi	zwa	nhecan	zwh	teocom	chieucao	zbmi	bu6thang	bot	thuacanmoi	q20moi	q15moi	q22moi	q19moi	q6moi
ID	Getting full vaccination	Residence location	Age (months)	Gender	Breastfeeding in the first hour	Gross household income	Length/height-for-age-Zscore	Stunting	Weight-for-age-Zscore	Underweight	Weight-for-length/height-Zscore	Wasting	length/height	Body Mass Index-Zscore	Exclusive breastfeeding for the first 6 months	Receiving conmplementary foods	Overweight/obesity	Education	Age (years)	Number of children in household	Occupation	Weight at birth
